# Supplementary material for: Gene Expression Changes in the Ventral Tegmental Area of Male Mice with Alternative Social Behavior Experience in Chronic Agonistic Interactions
Source: Int J Mol Sci. 2020 Sep 9;21(18):6599. doi: 10.3390/ijms21186599 (PMC7555283; doi:10.3390/ijms21186599)
Supplement: Supplementary file 1 [file ijms-21-06599-s001.xlsx]

## Sheet: Supplementary_Table_1
Supplementary Table 1. Genes differentially expressed in VTA of winners (aggressive) mice as compared to controls
gene ID	gene symbol	locus	value, FPKM Controls	value, FPKM Winners	log2(fold_change) Winners/Controls	q_value	Name
57267	Apba3	chr10:81268006-81291581	12.2793	27.0816	1.14108	0.0204833	amyloid beta (A4) precursor protein-binding, family A, member 3(Apba3)
67382	Brd3	chr2:27445510-27475673	52.4937	13.9491	-1.91197	0.0204833	bromodomain containing 3(Brd3)
320203	C130071C03Rik	chr13:83715345-83928710	4.69307	52.3126	3.47856	0.0204833	RIKEN cDNA C130071C03 gene(C130071C03Rik)
69131	Cdk12	chr11:98202719-98280045	228.618	5.21192	-5.45498	0.0204833	cyclin-dependent kinase 12(Cdk12)
12741	Cldn5	chr16:18776846-18778262	52.135	30.7704	-0.760707	0.0204833	claudin 5(Cldn5)
13207	Ddx5	chr11:106780156-106818861	121.771	381.376	1.64704	0.0204833	DEAD (Asp-Glu-Ala-Asp) box polypeptide 5(Ddx5)
15502	Dnaja1	chr4:40720153-40757885	41.9018	104.772	1.32217	0.0204833	DnaJ heat shock protein family (Hsp40) member A1(Dnaja1)
353156	Egfl7	chr2:26581055-26592925	44.2798	22.996	-0.945268	0.0204833	EGF-like domain 7(Egfl7)
13871	Ercc2	chr7:19382024-19404104	53.4164	8.71682	-2.61541	0.0204833	excision repair cross-complementing rodent repair deficiency, complementation group 2(Ercc2)
320267	Fubp3	chr2:31572650-31617590	11.2078	60.2594	2.42669	0.0204833	far upstream element (FUSE) binding protein 3(Fubp3)
231659	Gcn1l1	chr5:115565262-115622746	193.097	10.7235	-4.17048	0.0204833	GCN1 general control of amino-acid synthesis 1-like 1 (yeast)(Gcn1l1)
14580	Gfap	chr11:102887335-102897200	56.017	30.1095	-0.895645	0.0204833	glial fibrillary acidic protein(Gfap)
620695	Gm13889	chr2:93940169-93959193	25.025	15.0924	-0.729543	0.0358458	predicted gene 13889(Gm13889)
16814	Lbx1	chr19:45232619-45235377	7.18204	3.19458	-1.16877	0.0204833	ladybird homeobox homolog 1 (Drosophila)(Lbx1)
94352	Loxl2	chr14:69609475-69695834	1.06006	46.2481	5.44717	0.0204833	lysyl oxidase-like 2(Loxl2)
17132	Maf	chr8:115682935-115707940	9.65978	5.9756	-0.692907	0.0358458	avian musculoaponeurotic fibrosarcoma oncogene homolog(Maf)
236792	Mmgt1	chrX:56585424-56598134	50.2348	10.0622	-2.31975	0.0204833	membrane magnesium transporter 1(Mmgt1)
71960	Myh14	chr7:44605718-44670912	49.6651	31.9284	-0.637393	0.0486962	myosin, heavy polypeptide 14(Myh14)
17888	Myh6	chr14:54936101-54966607	1.46952	59.8955	5.34903	0.0204833	myosin, heavy polypeptide 6, cardiac muscle, alpha(Myh6)
17926	Myoc	chr1:162639149-162658219	2.84354	0.768103	-1.88832	0.0204833	myocilin(Myoc)
18053	Ngfr	chr11:95568820-95587698	3.55022	2.00879	-0.821583	0.0204833	nerve growth factor receptor (TNFR superfamily, member 16)(Ngfr)
18096	Nkx6-1	chr5:101658055-101665361	5.00751	2.78505	-0.846392	0.0358458	NK6 homeobox 1(Nkx6-1)
18121	Nog	chr11:89300637-89302559	2.5857	1.28866	-1.00469	0.0486962	noggin(Nog)
53324	Nptx2	chr5:144545886-144557478	3.27828	1.5928	-1.04137	0.0204833	neuronal pentraxin 2(Nptx2)
64011	Nrgn	chr9:37544492-37552745	22.349	14.1458	-0.659831	0.0358458	neurogranin(Nrgn)
71805	Nup93	chr8:94214551-94328103	33.1254	6.10602	-2.43963	0.0204833	nucleoporin 93(Nup93)
11545	Parp1	chr1:180568937-180601389	12.9335	102.036	2.97989	0.0204833	poly (ADP-ribose) polymerase family, member 1(Parp1)
116939	Pnpla3	chr15:84167724-84189590	59.9211	14.7013	-2.02712	0.0358458	patatin-like phospholipase domain containing 3(Pnpla3)
68458	Ppp1r14a	chr7:29289052-29296764	209.699	121.456	-0.787888	0.0204833	protein phosphatase 1, regulatory (inhibitor) subunit 14A(Ppp1r14a)
19132	Prph	chr15:99055048-99058978	46.5807	26.0311	-0.839495	0.0204833	peripherin(Prph)
212108	Rln3	chr8:84043066-84044979	32.0268	9.85139	-1.70088	0.0204833	relaxin 3(Rln3)
108077	Skiv2l	chr17:34837018-34850215	20.0798	110.465	2.45978	0.0204833	superkiller viralicidic activity 2-like (S. cerevisiae)(Skiv2l)
72961	Slc17a7	chr7:45163920-45176328	10.739	20.5899	0.939078	0.0204833	solute carrier family 17 (sodium-dependent inorganic phosphate cotransporter), member 7(Slc17a7)
15567	Slc6a4	chr11:76998596-77032343	5.03202	9.99298	0.989777	0.0204833	solute carrier family 6 (neurotransmitter transporter, serotonin), member 4(Slc6a4)
319757	Smo	chr6:29735496-29761366	13.6917	7.57591	-0.853809	0.0204833	smoothened, frizzled class receptor(Smo)
100217461	Snord89	chr1:39547991-39549386	0.989341	12.8481	3.69894	0.0204833	small nucleolar RNA, C/D box 89(Snord89)
20672	Sox18	chr2:181669836-181671640	9.60056	5.15091	-0.898291	0.0204833	SRY (sex determining region Y)-box 18(Sox18)
75316	Taf1d	chr9:15283336-15357841	10.2166	250.181	4.61399	0.0204833	TATA-box binding protein associated factor, RNA polymerase I, D(Taf1d)
100039596	Tcf24	chr1:9960162-9967485	0.391159	0.890055	1.18614	0.0486962	transcription factor 24(Tcf24)
21416	Tcf7l2	chr19:55741714-55933693	6.55832	3.43679	-0.932264	0.0204833	transcription factor 7 like 2, T cell specific, HMG box(Tcf7l2)
77832	Tchp	chr5:114707774-114722379	14.7421	5.50008	-1.42242	0.0204833	trichoplein, keratin filament binding(Tchp)
216343	Tph2	chr10:115078553-115185022	7.52483	13.789	0.873787	0.0486962	tryptophan hydroxylase 2(Tph2)
215008	Vezt	chr10:93961440-94035807	6.3458	21.0371	1.72906	0.0486962	vezatin, adherens junctions transmembrane protein(Vezt)
244216	Zfp771	chr7:127244525-127254801	29.0942	17.9567	-0.696212	0.0358458	zinc finger protein 771(Zfp771)

## Sheet: Supplementary _Table_2
Supplementary Table 2. Genes differentially expressed in VTA of losers as compared to controls
gene ID	gene symbol	locus	value, FPKM Controls	value, FPKM Losers	log2(fold_change) Losers/Controls	q_value	Name
100503859	1110015O18Rik	chr3:4798707-4815554	0.825711	1.84838	1.16255	0.0346188	RIKEN cDNA 1110015O18 gene(1110015O18Rik)
72061	2010111I01Rik	chr13:62964884-63431745	5.29116	36.8394	2.79959	0.00629432	RIKEN cDNA 2010111I01 gene(2010111I01Rik)
229694	AI504432	chr3:107039503-107054322	6.32537	10.5002	0.731191	0.00629432	expressed sequence AI504432(AI504432)
83397	Akap12	chr10:4266328-4359605	30.7449	19.8392	-0.631993	0.0158761	A kinase (PRKA) anchor protein (gravin) 12(Akap12)
23801	Aloxe3	chr11:69126359-69149173	0.838121	1.69153	1.0131	0.0158761	arachidonate lipoxygenase 3(Aloxe3)
213121	Ankrd35	chr3:96670078-96691091	13.3212	7.00239	-0.927802	0.00629432	ankyrin repeat domain 35(Ankrd35)
12306	Anxa2	chr9:69453682-69491785	16.0442	6.76609	-1.24566	0.00629432	annexin A2(Anxa2)
11746	Anxa4	chr6:86736652-86793645	5.39914	2.37137	-1.18701	0.00629432	annexin A4(Anxa4)
11749	Anxa6	chr11:54978904-55033471	50.1634	29.6928	-0.756523	0.00629432	annexin A6(Anxa6)
57267	Apba3	chr10:81268006-81291581	12.0436	31.2801	1.37698	0.00629432	amyloid beta (A4) precursor protein-binding, family A, member 3(Apba3)
244810	AW551984	chr9:39587377-39604281	9.00523	14.9834	0.734535	0.0115396	expressed sequence AW551984(AW551984)
29810	Bag3	chr7:128523582-128546979	21.991	9.86243	-1.1569	0.00629432	BCL2-associated athanogene 3(Bag3)
67382	Brd3	chr2:27445510-27475673	51.2993	15.9479	-1.68557	0.00629432	bromodomain containing 3(Brd3)
75770	Brsk2	chr7:141945244-142004345	40.6563	169.387	2.05877	0.00629432	BR serine/threonine kinase 2(Brsk2)
226359	C1ql2	chr1:120340244-120344333	6.12531	10.8699	0.827483	0.00629432	complement component 1, q subcomponent-like 2(C1ql2)
12290	Cacna1e	chr1:154390344-154884412	7.25942	11.609	0.677317	0.027542	calcium channel, voltage-dependent, R type, alpha 1E subunit(Cacna1e)
12310	Calca	chr7:114631477-114636357	23.9702	5.13922	-2.22162	0.00629432	calcitonin/calcitonin-related polypeptide, alpha(Calca)
116903	Calcb	chr7:114718642-114723365	5.11562	1.30308	-1.97298	0.00629432	calcitonin-related polypeptide, beta(Calcb)
12322	Camk2a	chr18:60925325-60988993	21.0447	32.6959	0.635652	0.027542	calcium/calmodulin-dependent protein kinase II alpha(Camk2a)
12333	Capn1	chr19:5970233-6018459	14.5707	8.36486	-0.800653	0.00629432	calpain 1(Capn1)
12484	Cd24a	chr10:43578699-43584269	19.6361	10.1424	-0.953109	0.00629432	CD24a antigen(Cd24a)
69131	Cdk12	chr11:98202719-98280045	224.848	5.22326	-5.42786	0.00629432	cyclin-dependent kinase 12(Cdk12)
12575	Cdkn1a	chr17:29090985-29100722	5.81847	3.4321	-0.761546	0.027542	cyclin-dependent kinase inhibitor 1A (P21)(Cdkn1a)
12577	Cdkn1c	chr7:143458338-143461074	5.5892	3.08276	-0.858422	0.00629432	cyclin-dependent kinase inhibitor 1C (P57)(Cdkn1c)
109901	Cela1	chr15:100674421-100687920	4.18888	1.89743	-1.14252	0.027542	chymotrypsin-like elastase family, member 1(Cela1)
68178	Cgnl1	chr9:71626420-71771602	13.4746	8.33683	-0.692668	0.00629432	cingulin-like 1(Cgnl1)
246048	Chodl	chr16:78930787-78951788	7.8917	2.36123	-1.7408	0.00629432	chondrolectin(Chodl)
11440	Chrna6	chr8:27403211-27413944	0.771837	2.24009	1.53719	0.00629432	cholinergic receptor, nicotinic, alpha polypeptide 6(Chrna6)
72978	Cnih3	chr1:181352362-181471100	2.39135	4.77559	0.997857	0.0158761	cornichon family AMPA receptor auxiliary protein 3(Cnih3)
269637	Cnpy1	chr5:28200829-28237873	1.25342	3.47961	1.47306	0.00629432	canopy FGF signaling regulator 1(Cnpy1)
77018	Col25a1	chr3:130180797-130599886	3.25076	5.2425	0.689477	0.0205148	collagen, type XXV, alpha 1(Col25a1)
102639719	Colq	chr14:31523083-31577383	2.13515	0.782297	-1.44855	0.00629432	collagen-like tail subunit (single strand of homotrimer) of asymmetric acetylcholinesterase(Colq)
240058	Cpne5	chr17:29156089-29238420	4.81751	7.84902	0.704225	0.0158761	copine V(Cpne5)
72832	Crtac1	chr19:42283020-42432751	24.8333	15.9651	-0.637349	0.00629432	cartilage acidic protein 1(Crtac1)
108062	Cstf2	chrX:134059162-134111854	40.5652	23.0914	-0.812889	0.0472521	cleavage stimulation factor, 3' pre-RNA subunit 2(Cstf2)
69274	Ctdspl	chr9:118921134-119044353	5.14146	26.5586	2.36893	0.00629432	CTD (carboxy-terminal domain, RNA polymerase II, polypeptide A) small phosphatase-like(Ctdspl)
232174	Cyp26b1	chr6:84571413-84593908	11.2268	6.4088	-0.808821	0.00629432	cytochrome P450, family 26, subfamily b, polypeptide 1(Cyp26b1)
13142	Dao	chr5:114003734-114025676	5.16939	2.54867	-1.02025	0.00629432	D-amino acid oxidase(Dao)
13195	Ddc	chr11:11814099-11898144	14.2909	35.122	1.29727	0.00629432	dopa decarboxylase(Ddc)
13199	Ddn	chr15:98803707-98810336	0.64737	1.79976	1.47514	0.00629432	dendrin(Ddn)
13347	Dffa	chr4:149104141-149120733	42.762	23.4301	-0.867962	0.00629432	DNA fragmentation factor, alpha subunit(Dffa)
13406	Dmp1	chr5:104197550-104214105	6.69734	2.92213	-1.19657	0.00629432	dentin matrix protein 1(Dmp1)
15502	Dnaja1	chr4:40720153-40757885	41.1536	155.221	1.91523	0.00629432	DnaJ heat shock protein family (Hsp40) member A1(Dnaja1)
13555	E2f1	chr2:154559399-154569892	4.74638	2.38224	-0.994508	0.00629432	E2F transcription factor 1(E2f1)
13599	Ecel1	chr1:87141485-87156366	16.6771	7.64157	-1.12593	0.00629432	endothelin converting enzyme-like 1(Ecel1)
353156	Egfl7	chr2:26581055-26592925	43.3623	22.0904	-0.973022	0.00629432	EGF-like domain 7(Egfl7)
13653	Egr1	chr18:34861206-34864956	9.61541	15.7484	0.711785	0.0115396	early growth response 1(Egr1)
13798	En1	chr1:120602486-120607991	5.32141	10.2745	0.949193	0.00629432	engrailed 1(En1)
13799	En2	chr5:28165695-28172166	3.09252	5.95111	0.944375	0.00629432	engrailed 2(En2)
71889	Epn3	chr11:94489598-94500099	5.8272	3.59493	-0.696838	0.0158761	epsin 3(Epn3)
23943	Esyt1	chr10:128509541-128526059	22.9939	14.6778	-0.647615	0.027542	extended synaptotagmin-like protein 1(Esyt1)
219148	Fam167a	chr14:63436393-63465502	0.285608	0.67946	1.25035	0.0346188	family with sequence similarity 167, member A(Fam167a)
58238	Fam181b	chr7:93079878-93081721	24.7844	15.7729	-0.651989	0.0242939	family with sequence similarity 181, member B(Fam181b)
68952	Fam57b	chr7:126812804-126830220	79.3925	50.9039	-0.641226	0.0373883	family with sequence similarity 57, member B(Fam57b)
241303	Fam78a	chr2:32066864-32084879	2.62426	1.25975	-1.05877	0.00629432	family with sequence similarity 78, member A(Fam78a)
207215	Fbxo40	chr16:36963476-36979136	0.885106	0.292935	-1.59527	0.00629432	F-box protein 40(Fbxo40)
260298	Fev	chr1:74881508-74885408	1.24947	3.94692	1.65941	0.00629432	FEV (ETS oncogene family)(Fev)
114142	Foxp2	chr6:14901169-15442450	1.59217	3.15126	0.984938	0.00629432	forkhead box P2(Foxp2)
14314	Fstl1	chr16:37777054-37836516	25.4014	16.2663	-0.643026	0.0242939	follistatin-like 1(Fstl1)
213262	Fstl5	chr3:76074560-76710025	5.68023	8.85399	0.640379	0.0472521	follistatin-like 5(Fstl5)
14394	Gabra1	chr11:42130920-42183066	45.2634	77.9372	0.783968	0.00629432	gamma-aminobutyric acid (GABA) A receptor, subunit alpha 1(Gabra1)
14401	Gabrb2	chr11:42419746-42632694	19.5497	29.0831	0.573033	0.0445822	gamma-aminobutyric acid (GABA) A receptor, subunit beta 2(Gabrb2)
14406	Gabrg2	chr11:41909958-42000874	25.1364	38.2113	0.60422	0.0158761	gamma-aminobutyric acid (GABA) A receptor, subunit gamma 2(Gabrg2)
14415	Gad1	chr2:70489939-70602029	48.9257	79.7321	0.704567	0.00629432	glutamate decarboxylase 1(Gad1)
14417	Gad2	chr2:22622057-22694078	34.0411	54.2945	0.673529	0.0242939	glutamic acid decarboxylase 2(Gad2)
14528	Gch1	chr14:47153894-47189402	1.53237	3.58208	1.22503	0.00629432	GTP cyclohydrolase 1(Gch1)
320415	Gchfr	chr2:119167787-119172389	2.55837	6.9636	1.44461	0.0158761	GTP cyclohydrolase I feedback regulator(Gchfr)
	Gcn1l1	chr5:115565262-115622746	190.43	12.2435	-3.95918	0.00629432	GCN1 general control of amino-acid synthesis 1-like 1 (yeast)(Gcn1l1)
14579	Gem	chr4:11704446-11714993	1.66113	0.783721	-1.08375	0.0373883	GTP binding protein (gene overexpressed in skeletal muscle)(Gem)
14580	Gfap	chr11:102887335-102897200	54.9519	20.3525	-1.43296	0.00629432	glial fibrillary acidic protein(Gfap)
118454	Gjc2	chr11:59175476-59183213	41.3181	24.8093	-0.735893	0.0115396	gap junction protein, gamma 2(Gjc2)
620695	Gm13889	chr2:93940169-93959193	24.539	13.8987	-0.820127	0.00629432	predicted gene 13889(Gm13889)
14555	Gpd1	chr15:99717592-99725007	38.9167	21.8271	-0.834267	0.00629432	glycerol-3-phosphate dehydrogenase 1 (soluble)(Gpd1)
76206	Gpr165	chrX:96713355-96721859	7.67903	12.3017	0.679865	0.0346188	G protein-coupled receptor 165(Gpr165)
233919	Gpr26	chr7:131966166-131994361	2.79164	4.92518	0.819063	0.00629432	G protein-coupled receptor 26(Gpr26)
170935	Grid2ip	chr5:143357337-143394560	3.00887	1.63245	-0.882185	0.027542	glutamate receptor, ionotropic, delta 2 (Grid2) interacting protein 1(Grid2ip)
56016	Hebp2	chr10:18540122-18546076	9.06665	5.15743	-0.813917	0.0115396	heme binding protein 2(Hebp2)
15208	Hes5	chr4:154960922-154962371	5.85571	11.054	0.916657	0.00629432	hairy and enhancer of split 5 (Drosophila)(Hes5)
103889	Hoxb2	chr11:96323125-96354174	3.71572	0.639734	-2.5381	0.00629432	homeobox B2(Hoxb2)
15410	Hoxb3	chr11:96323125-96354174	2.98471	0.312404	-3.25611	0.00629432	homeobox B3(Hoxb3)
15434	Hoxd3	chr2:74710043-74765142	1.81707	0.0785417	-4.53201	0.0115396	homeobox D3(Hoxd3)
170638	Hpcal4	chr4:123183503-123194699	12.4138	20.1881	0.701556	0.00629432	hippocalcin-like 4(Hpcal4)
15507	Hspb1	chr5:135887918-135889563	26.2088	8.90024	-1.55814	0.00629432	heat shock protein 1(Hspb1)
80888	Hspb8	chr5:116408489-116422864	20.0878	9.36022	-1.10171	0.00629432	heat shock protein 8(Hspb8)
16008	Igfbp2	chr1:72824479-72852475	44.66	26.0032	-0.780294	0.00629432	insulin-like growth factor binding protein 2(Igfbp2)
210094	Iglon5	chr7:43472528-43490268	57.0767	37.5473	-0.604193	0.0445822	IgLON family member 5(Iglon5)
93842	Igsf9	chr1:172481846-172498877	1.0712	1.87602	0.808451	0.0373883	immunoglobulin superfamily, member 9(Igsf9)
16324	Inhbb	chr1:119415464-119422248	3.43923	2.14862	-0.678679	0.0373883	inhibin beta-B(Inhbb)
16370	Irs4	chrX:141710996-141725254	1.75745	3.33168	0.92277	0.00629432	insulin receptor substrate 4(Irs4)
16392	Isl1	chr13:116298269-116309693	1.60769	0.486404	-1.72476	0.00629432	ISL1 transcription factor, LIM/homeodomain(Isl1)
66240	Kcne1l	chrX:142304752-142306198	12.0235	7.21217	-0.737354	0.0242939	potassium voltage-gated channel, Isk-related family, member 1-like, pseudogene(Kcne1l)
66733	Kcng4	chr8:119622933-119636034	26.301	12.8001	-1.03896	0.00629432	potassium voltage-gated channel, subfamily G, member 4(Kcng4)
19144	Klk6	chr7:43824543-43832027	37.3269	23.4518	-0.670517	0.0242939	kallikrein related-peptidase 6(Klk6)
57896	Krcc1	chr6:71271590-71285358	17.8557	8.33467	-1.09919	0.00629432	lysine-rich coiled-coil 1(Krcc1)
76161	Lamp5	chr2:136051988-136070070	73.8033	25.1281	-1.55439	0.00629432	lysosomal-associated membrane protein family, member 5(Lamp5)
16814	Lbx1	chr19:45232619-45235377	7.03998	0.706751	-3.3163	0.00629432	ladybird homeobox homolog 1 (Drosophila)(Lbx1)
16852	Lgals1	chr15:78926724-78930465	28.0706	9.30867	-1.59241	0.00629432	lectin, galactose binding, soluble 1(Lgals1)
17132	Maf	chr8:115682935-115707940	9.48	5.55381	-0.771408	0.00629432	avian musculoaponeurotic fibrosarcoma oncogene homolog(Maf)
16658	Mafb	chr2:160363676-160367065	4.46987	2.50554	-0.83511	0.00629432	v-maf musculoaponeurotic fibrosarcoma oncogene family, protein B (avian)(Mafb)
	March11	chr15:26308773-26409600	5.76521	3.15431	-0.870051	0.0115396	membrane-associated ring finger (C3HC4) 11(March11)
14013	Mecom	chr3:29951264-30013204	1.23265	0.597745	-1.04416	0.00629432	MDS1 and EVI1 complex locus(Mecom)
17395	Mmp9	chr2:164948218-164955849	2.25854	0.894773	-1.3358	0.00629432	matrix metallopeptidase 9(Mmp9)
17540	Mrvi1	chr7:110868257-110982461	1.24263	0.680306	-0.869136	0.0445822	MRV integration site 1(Mrvi1)
17698	Msn	chrX:96096044-96168553	12.2604	7.95851	-0.623438	0.0205148	moesin(Msn)
71960	Myh14	chr7:44605718-44670912	48.6997	28.1174	-0.792451	0.00629432	myosin, heavy polypeptide 14(Myh14)
17888	Myh6	chr14:54936101-54966607	1.44184	20.9169	3.85868	0.0242939	myosin, heavy polypeptide 6, cardiac muscle, alpha(Myh6)
17926	Myoc	chr1:162639149-162658219	2.78923	0.659422	-2.08059	0.00629432	myocilin(Myoc)
380684	Nefh	chr11:4938562-5042794	287.727	119.703	-1.26524	0.00629432	neurofilament, heavy polypeptide(Nefh)
18039	Nefl	chr14:68082365-68092351	914.723	422.748	-1.11354	0.00629432	neurofilament, light polypeptide(Nefl)
18040	Nefm	chr14:68119465-68131373	690.57	269.101	-1.35964	0.00629432	neurofilament, medium polypeptide(Nefm)
18013	Neurod2	chr11:98325416-98329645	2.92384	1.5893	-0.879475	0.0242939	neurogenic differentiation 2(Neurod2)
64242	Ngb	chr12:87097530-87102539	9.25453	20.2127	1.12703	0.00629432	neuroglobin(Ngb)
18053	Ngfr	chr11:95568820-95587698	3.4796	1.91457	-0.861899	0.0158761	nerve growth factor receptor (TNFR superfamily, member 16)(Ngfr)
18096	Nkx6-1	chr5:101658055-101665361	4.91127	1.65993	-1.56498	0.00629432	NK6 homeobox 1(Nkx6-1)
114249	Npnt	chr3:132881714-132950291	4.24793	7.14813	0.750806	0.0373883	nephronectin(Npnt)
64011	Nrgn	chr9:37544492-37552745	21.9464	42.7835	0.963071	0.00629432	neurogranin(Nrgn)
18186	Nrp1	chr8:128358639-128505662	5.88702	39.7742	2.75622	0.00629432	neuropilin 1(Nrp1)
171171	Ntng2	chr2:29193828-29253707	25.612	14.932	-0.778412	0.027542	netrin G2(Ntng2)
18423	Otx1	chr11:21994763-22001651	0.620819	2.50031	2.00986	0.00629432	orthodenticle homeobox 1(Otx1)
18424	Otx2	chr14:48657676-48667644	0.725079	2.03392	1.48806	0.0115396	orthodenticle homeobox 2(Otx2)
74337	Palm3	chr8:84021473-84042575	7.03504	2.06461	-1.76869	0.00629432	paralemmin 3(Palm3)
18504	Pax2	chr19:44746709-44838266	8.37769	3.01544	-1.47418	0.00629432	paired box 2(Pax2)
18509	Pax7	chr4:139737093-139832968	0.454997	1.64041	1.85013	0.00629432	paired box 7(Pax7)
237823	Pfas	chr11:68985430-69012481	6.27793	24.3122	1.95332	0.00629432	phosphoribosylformylglycinamidine synthase (FGAR amidotransferase)(Pfas)
237928	Phospho1	chr11:95824454-95845731	38.3626	22.1505	-0.792357	0.0158761	phosphatase, orphan 1(Phospho1)
18935	Phox2b	chr5:67094327-67099126	7.02732	1.55975	-2.17166	0.00629432	paired-like homeobox 2b(Phox2b)
18767	Pkia	chr3:7366603-7445481	21.479	32.9245	0.616234	0.0312685	protein kinase inhibitor, alpha(Pkia)
269437	Plch1	chr3:63696207-63851191	3.27989	5.18112	0.659615	0.0312685	phospholipase C, eta 1(Plch1)
217682	Plekhd1	chr12:80692600-80724287	8.5661	5.56947	-0.621097	0.0472521	pleckstrin homology domain containing, family D (with coiled-coil domains) member 1(Plekhd1)
54712	Plxnc1	chr10:94790865-94945265	2.64865	4.38538	0.727449	0.0115396	plexin C1(Plxnc1)
19132	Prph	chr15:99055048-99058978	45.6951	9.83989	-2.21532	0.00629432	peripherin(Prph)
19142	Prss12	chr3:123446912-123506602	4.22817	1.89111	-1.1608	0.00629432	protease, serine 12 neurotrypsin (motopsin)(Prss12)
19200	Pstpip1	chr9:56089975-56128890	3.31815	1.54509	-1.10269	0.00629432	proline-serine-threonine phosphatase-interacting protein 1(Pstpip1)
19293	Pvalb	chr15:78191044-78206351	119.085	70.0658	-0.765208	0.00629432	parvalbumin(Pvalb)
19352	Rabggtb	chr3:153907193-153913030	453.604	24.8146	-4.19217	0.00629432	Rab geranylgeranyl transferase, b subunit(Rabggtb)
56089	Ramp3	chr11:6650147-6677482	0.97033	2.598	1.42086	0.0346188	receptor (calcitonin) activity modifying protein 3(Ramp3)
67792	Rgs8	chr1:153652917-153697781	12.3553	19.9397	0.690514	0.0158761	regulator of G-protein signaling 8(Rgs8)
19771	Rlbp1	chr7:79374791-79387027	2.81719	1.4531	-0.955123	0.0312685	retinaldehyde binding protein 1(Rlbp1)
212108	Rln3	chr8:84043066-84044979	31.3364	2.68583	-3.5444	0.00629432	relaxin 3(Rln3)
19885	Rorc	chr3:94372793-94398274	2.96839	1.40109	-1.08313	0.00629432	RAR-related orphan receptor gamma(Rorc)
239405	Rspo2	chr15:43020794-43170818	1.46296	0.444818	-1.7176	0.00629432	R-spondin 2(Rspo2)
237847	Rtn4rl1	chr11:75193258-75268644	2.18154	3.71304	0.767258	0.0205148	reticulon 4 receptor-like 1(Rtn4rl1)
20269	Scn3a	chr2:65456990-65567519	3.86299	6.64454	0.78245	0.0346188	sodium channel, voltage-gated, type III, alpha(Scn3a)
235281	Scn3b	chr9:40269215-40291799	9.14763	14.5677	0.671308	0.0242939	sodium channel, voltage-gated, type III, beta(Scn3b)
545474	Scrt2	chr2:152081528-152095802	13.2989	7.03554	-0.918574	0.00629432	scratch family zinc finger 2(Scrt2)
20350	Sema3f	chr9:107681497-107710475	4.87526	8.18563	0.747615	0.0373882	sema domain, immunoglobulin domain (Ig), short basic domain, secreted, (semaphorin) 3F(Sema3f)
20361	Sema7a	chr9:57940134-57962936	48.0294	30.0777	-0.675221	0.00629432	sema domain, immunoglobulin domain (Ig), and GPI membrane anchor, (semaphorin) 7A(Sema7a)
329641	Sertm1	chr3:54897068-54915887	2.86279	5.14692	0.846286	0.00629432	serine rich and transmembrane domain containing 1(Sertm1)
50795	Sh3bgr	chr16:96158232-96228937	15.9014	6.75303	-1.23555	0.00629432	SH3-binding domain glutamic acid-rich protein(Sh3bgr)
216227	Slc17a8	chr10:89574019-89621249	0.89835	2.11974	1.23854	0.00629432	solute carrier family 17 (sodium-dependent inorganic phosphate cotransporter), member 8(Slc17a8)
20508	Slc18a3	chr14:32407354-32466004	33.828	13.295	-1.34734	0.00629432	solute carrier family 18 (vesicular monoamine), member 3(Slc18a3)
20519	Slc22a3	chr17:12419973-12507704	0.352457	1.03493	1.55401	0.00629432	solute carrier family 22 (organic cation transporter), member 3(Slc22a3)
104910	Slc25a47	chr12:108836115-108856841	23.841	2.74704	-3.11749	0.00629432	solute carrier family 25, member 47(Slc25a47)
20538	Slc6a2	chr8:92960641-93001667	7.51725	4.86692	-0.627197	0.0346188	solute carrier family 6 (neurotransmitter transporter, noradrenalin), member 2(Slc6a2)
13162	Slc6a3	chr13:73536746-73578672	1.02618	9.51074	3.21228	0.00629432	solute carrier family 6 (neurotransmitter transporter, dopamine), member 3(Slc6a3)
15567	Slc6a4	chr11:76998596-77032343	4.94347	22.7069	2.19953	0.00629432	solute carrier family 6 (neurotransmitter transporter, serotonin), member 4(Slc6a4)
104245	Slc6a5	chr7:49909938-49963861	45.0599	13.7913	-1.70808	0.00629432	solute carrier family 6 (neurotransmitter transporter, glycine), member 5(Slc6a5)
11989	Slc7a3	chrX:101079148-101086045	6.25767	10.6966	0.773452	0.0242939	solute carrier family 7 (cationic amino acid transporter, y+ system), member 3(Slc7a3)
20562	Slit1	chr19:41597817-41750097	8.5361	12.9731	0.603874	0.0312685	slit homolog 1 (Drosophila)(Slit1)
319757	Smo	chr6:29735496-29761366	13.4278	7.61329	-0.818629	0.0373883	smoothened, frizzled class receptor(Smo)
20618	Sncg	chr14:34370273-34374669	185.032	99.6342	-0.893062	0.00629432	synuclein, gamma(Sncg)
20657	Sod3	chr5:52363803-52369738	12.4619	7.18869	-0.793727	0.00629432	superoxide dismutase 3, extracellular(Sod3)
20669	Sox14	chr9:99874105-99876170	0.742073	2.21027	1.57459	0.00629432	SRY (sex determining region Y)-box 14(Sox14)
20750	Spp1	chr5:104435110-104441053	54.7988	23.5698	-1.21721	0.00629432	secreted phosphoprotein 1(Spp1)
269019	Stk32a	chr18:43207394-43318579	6.57893	3.20827	-1.03606	0.00629432	serine/threonine kinase 32A(Stk32a)
71733	Susd2	chr10:75636618-75644008	23.1405	14.828	-0.642094	0.0115396	sushi domain containing 2(Susd2)
72003	Synpr	chr14:13284719-13615469	5.86042	10.5418	0.847051	0.00629432	synaptoporin(Synpr)
20979	Syt1	chr10:108497647-109010983	51.3193	86.9291	0.760337	0.00629432	synaptotagmin I(Syt1)
75316	Taf1d	chr9:15283336-15357841	10.0335	240.58	4.58362	0.00629432	TATA-box binding protein associated factor, RNA polymerase I, D(Taf1d)
21349	Tal1	chr4:115056425-115071758	2.44588	4.254	0.798466	0.0205148	T cell acute lymphocytic leukemia 1(Tal1)
57246	Tbx20	chr9:24720811-24774303	0.864034	0.253703	-1.76795	0.00629432	T-box 20(Tbx20)
50765	Tfr2	chr5:137569839-137588081	0.725141	1.39249	0.94133	0.027542	transferrin receptor 2(Tfr2)
21809	Tgfb3	chr12:86056580-86079159	6.98611	4.45777	-0.648168	0.0373883	transforming growth factor, beta 3(Tgfb3)
21823	Th	chr7:142892670-142901960	10.9254	21.9644	1.00748	0.00629432	tyrosine hydroxylase(Th)
223626	Them6	chr15:74721233-74724373	44.3546	29.0734	-0.609383	0.0472521	thioesterase superfamily member 6(Them6)
216343	Tph2	chr10:115078553-115185022	7.3958	26.9746	1.86683	0.00629432	tryptophan hydroxylase 2(Tph2)
69539	Trnp1	chr4:133490503-133501087	79.0267	48.3214	-0.709679	0.00629432	TMF1-regulated nuclear protein 1(Trnp1)
22337	Vdr	chr15:97854426-97908296	0.761608	0.286046	-1.4128	0.0115396	vitamin D receptor(Vdr)
215008	Vezt	chr10:93961440-94035807	6.22886	26.7758	2.10389	0.00629432	vezatin, adherens junctions transmembrane protein(Vezt)
381677	Vgf	chr5:137025191-137033857	119.243	78.6067	-0.601174	0.0472521	VGF nerve growth factor inducible(Vgf)
22355	Vipr2	chr12:116077725-116146261	1.82727	0.386631	-2.24066	0.00629432	vasoactive intestinal peptide receptor 2(Vipr2)
75718	Vwa5b1	chr4:138564195-138636005	1.78722	3.59615	1.00874	0.0115396	von Willebrand factor A domain containing 5B1(Vwa5b1)
27762	Vwa7	chr17:35016502-35046745	9.031	3.53114	-1.35475	0.00629432	von Willebrand factor A domain containing 7(Vwa7)
73750	Whrn	chr4:63414854-63496130	21.722	13.8527	-0.648988	0.027542	whirlin(Whrn)
218820	Zfp503	chr14:21983905-21992404	5.91495	2.92015	-1.01832	0.00629432	zinc finger protein 503(Zfp503)
353310	Zfp703	chr8:26977335-26981462	15.3357	9.21457	-0.734907	0.00629432	zinc finger protein 703(Zfp703)
22776	Zim1	chr7:6671454-6696432	2.56009	4.41264	0.785448	0.0158761	zinc finger, imprinted 1(Zim1)
100041581	Zkscan16	chr4:58943559-58962705	7.72063	12.6629	0.713822	0.00629432	zinc finger with KRAB and SCAN domains 16(Zkscan16)

## Sheet: Supplementary _Table_3
Supplementary table 3. Metabolic pathways enriched by genes differentially expressed in VTA of losers as compared to control mice
	Term	PValue	gene ID	gene symbol	locus	control mice, FPKM	losers, FPKM	log2(fold_change) Losers/Control	q_value	Name
mmu05033	Nicotine addiction	0.000425108
			11440	Chrna6	chr8:27403211-27413944	0.771837	2.24009	1.53719	0.00629432	cholinergic receptor, nicotinic, alpha polypeptide 6(Chrna6)
			14394	Gabra1	chr11:42130920-42183066	45.2634	77.9372	0.783968	0.00629432	gamma-aminobutyric acid (GABA) A receptor, subunit alpha 1(Gabra1)
			14401	Gabrb2	chr11:42419746-42632694	19.5497	29.0831	0.573033	0.0445822	gamma-aminobutyric acid (GABA) A receptor, subunit beta 2(Gabrb2)
			14406	Gabrg2	chr11:41909958-42000874	25.1364	38.2113	0.60422	0.0158761	gamma-aminobutyric acid (GABA) A receptor, subunit gamma 2(Gabrg2)
			216227	Slc17a8	chr10:89574019-89621249	0.89835	2.11974	1.23854	0.00629432	solute carrier family 17 (sodium-dependent inorganic phosphate cotransporter), member 8(Slc17a8)
mmu04360	Axon guidance	0.0058569
			18186	Nrp1	chr8:128358639-128505662	5.88702	39.7742	2.75622	0.00629432	neuropilin 1(Nrp1)
			171171	Ntng2	chr2:29193828-29253707	25.612	14.932	-0.778412	0.027542	netrin G2(Ntng2)
			54712	Plxnc1	chr10:94790865-94945265	2.64865	4.38538	0.727449	0.0115396	plexin C1(Plxnc1)
			20350	Sema3f	chr9:107681497-107710475	4.87526	8.18563	0.747615	0.0373882	sema domain, immunoglobulin domain (Ig), short basic domain, secreted, (semaphorin) 3F(Sema3f)
			20361	Sema7a	chr9:57940134-57962936	48.0294	30.0777	-0.675221	0.00629432	sema domain, immunoglobulin domain (Ig), and GPI membrane anchor, (semaphorin) 7A(Sema7a)
			20562	Slit1	chr19:41597817-41750097	8.5361	12.9731	0.603874	0.0312685	slit homolog 1 (Drosophila)(Slit1)
mmu04727	GABAergic synapse	0.00755333
			14394	Gabra1	chr11:42130920-42183066	45.2634	77.9372	0.783968	0.00629432	gamma-aminobutyric acid (GABA) A receptor, subunit alpha 1(Gabra1)
			14401	Gabrb2	chr11:42419746-42632694	19.5497	29.0831	0.573033	0.0445822	gamma-aminobutyric acid (GABA) A receptor, subunit beta 2(Gabrb2)
			14406	Gabrg2	chr11:41909958-42000874	25.1364	38.2113	0.60422	0.0158761	gamma-aminobutyric acid (GABA) A receptor, subunit gamma 2(Gabrg2)
			14415	Gad1	chr2:70489939-70602029	48.9257	79.7321	0.704567	0.00629432	glutamate decarboxylase 1(Gad1)
			14417	Gad2	chr2:22622057-22694078	34.0411	54.2945	0.673529	0.0242939	glutamic acid decarboxylase 2(Gad2)
mmu05014	Amyotrophic lateral sclerosis	0.0105844
			380684	Nefh	chr11:4938562-5042794	287.727	119.703	-1.26524	0.00629432	neurofilament, heavy polypeptide(Nefh)
			18039	Nefl	chr14:68082365-68092351	914.723	422.748	-1.11354	0.00629432	neurofilament, light polypeptide(Nefl)
			18040	Nefm	chr14:68119465-68131373	690.57	269.101	-1.35964	0.00629432	neurofilament, medium polypeptide(Nefm)
			19132	Prph	chr15:99055048-99058978	45.6951	9.83989	-2.21532	0.00629432	peripherin(Prph)
mmu05031	Amphetamine addiction	0.0220017
			12322	Camk2a	chr18:60925325-60988993	21.0447	32.6959	0.635652	0.027542	calcium/calmodulin-dependent protein kinase II alpha(Camk2a)
			13195	Ddc	chr11:11814099-11898144	14.2909	35.122	1.29727	0.00629432	dopa decarboxylase(Ddc)
			13162	Slc6a3	chr13:73536746-73578672	1.02618	9.51074	3.21228	0.00629432	solute carrier family 6 (neurotransmitter transporter, dopamine), member 3(Slc6a3)
			21823	Th	chr7:142892670-142901960	10.9254	21.9644	1.00748	0.00629432	tyrosine hydroxylase(Th)
mmu05220	Chronic myeloid leukemia	0.0265409
			12575	Cdkn1a	chr17:29090985-29100722	5.81847	3.4321	-0.761546	0.027542	cyclin-dependent kinase inhibitor 1A (P21)(Cdkn1a)
			13555	E2f1	chr2:154559399-154569892	4.74638	2.38224	-0.994508	0.00629432	E2F transcription factor 1(E2f1)
			14013	Mecom	chr3:29951264-30013204	1.23265	0.597745	-1.04416	0.00629432	MDS1 and EVI1 complex locus(Mecom)
			21809	Tgfb3	chr12:86056580-86079159	6.98611	4.45777	-0.648168	0.0373883	transforming growth factor, beta 3(Tgfb3)
mmu05219	Bladder cancer	0.0519757
			12575	Cdkn1a	chr17:29090985-29100722	5.81847	3.4321	-0.761546	0.027542	cyclin-dependent kinase inhibitor 1A (P21)(Cdkn1a)
			13555	E2f1	chr2:154559399-154569892	4.74638	2.38224	-0.994508	0.00629432	E2F transcription factor 1(E2f1)
			17395	Mmp9	chr2:164948218-164955849	2.25854	0.894773	-1.3358	0.00629432	matrix metallopeptidase 9(Mmp9)
mmu05202	Transcriptional misregulation in cancer	0.0603196
			12575	Cdkn1a	chr17:29090985-29100722	5.81847	3.4321	-0.761546	0.027542	cyclin-dependent kinase inhibitor 1A (P21)(Cdkn1a)
			260298	Fev	chr1:74881508-74885408	1.24947	3.94692	1.65941	0.00629432	FEV (ETS oncogene family)(Fev)
			17132	Maf	chr8:115682935-115707940	9.48	5.55381	-0.771408	0.00629432	avian musculoaponeurotic fibrosarcoma oncogene homolog(Maf)
			17395	Mmp9	chr2:164948218-164955849	2.25854	0.894773	-1.3358	0.00629432	matrix metallopeptidase 9(Mmp9)
			18053	Ngfr	chr11:95568820-95587698	3.4796	1.91457	-0.861899	0.0158761	nerve growth factor receptor (TNFR superfamily, member 16)(Ngfr)
mmu04723	Retrograde endocannabinoid signaling	0.0648164
			14394	Gabra1	chr11:42130920-42183066	45.2634	77.9372	0.783968	0.00629432	gamma-aminobutyric acid (GABA) A receptor, subunit alpha 1(Gabra1)
			14401	Gabrb2	chr11:42419746-42632694	19.5497	29.0831	0.573033	0.0445822	gamma-aminobutyric acid (GABA) A receptor, subunit beta 2(Gabrb2)
			14406	Gabrg2	chr11:41909958-42000874	25.1364	38.2113	0.60422	0.0158761	gamma-aminobutyric acid (GABA) A receptor, subunit gamma 2(Gabrg2)
			216227	Slc17a8	chr10:89574019-89621249	0.89835	2.11974	1.23854	0.00629432	solute carrier family 17 (sodium-dependent inorganic phosphate cotransporter), member 8(Slc17a8)
mmu05030	Cocaine addiction	0.0712392
			13195	Ddc	chr11:11814099-11898144	14.2909	35.122	1.29727	0.00629432	dopa decarboxylase(Ddc)
			13162	Slc6a3	chr13:73536746-73578672	1.02618	9.51074	3.21228	0.00629432	solute carrier family 6 (neurotransmitter transporter, dopamine), member 3(Slc6a3)
			21823	Th	chr7:142892670-142901960	10.9254	21.9644	1.00748	0.00629432	tyrosine hydroxylase(Th)
mmu00430	Taurine and hypotaurine metabolism	0.0944356
			14415	Gad1	chr2:70489939-70602029	48.9257	79.7321	0.704567	0.00629432	glutamate decarboxylase 1(Gad1)
			14417	Gad2	chr2:22622057-22694078	34.0411	54.2945	0.673529	0.0242939	glutamic acid decarboxylase 2(Gad2)

## Sheet: Supplementary _Table_4
Supplementary Table 4. Genes differentially expressed in VTA of winners (aggressive mice) as compared to losers
gene ID	gene symbol	value, FPKM Winners	value, FPKM Losers	log2(fold_change) Losers/Winners	q_value	Name
72061	2010111I01Rik	5.79014	38.2429	2.72352	0.00612393	RIKEN cDNA 2010111I01 gene(2010111I01Rik)
378954	3000002C10Rik	1.34583	2.65842	0.982079	0.0339545	glyceraldehyde-3-phosphate dehydrogenase pseudogene(3000002C10Rik)
75135	4930526I15Rik	6.37381	23.3302	1.87197	0.0402512	RIKEN cDNA 4930526I15 gene(4930526I15Rik)
71166	4933424G06Rik	0.89213	1.70118	0.931207	0.0486705	RIKEN cDNA 4933424G06 gene(4933424G06Rik)
380787	A230065H16Rik	4.31321	9.8155	1.1863	0.00612393	RIKEN cDNA A230065H16 gene(A230065H16Rik)
83397	Akap12	28.344	20.4589	-0.470313	0.0190522	A kinase (PRKA) anchor protein (gravin) 12(Akap12)
67605	Akt1s1	23.0662	37.3542	0.695488	0.00612393	AKT1 substrate 1 (proline-rich)(Akt1s1)
23801	Aloxe3	1.00821	1.74456	0.791064	0.0369194	arachidonate lipoxygenase 3(Aloxe3)
213121	Ankrd35	10.2053	7.22319	-0.498616	0.0457253	ankyrin repeat domain 35(Ankrd35)
12306	Anxa2	12.5476	6.98233	-0.845632	0.00612393	annexin A2(Anxa2)
11746	Anxa4	4.44646	2.45455	-0.857196	0.0154015	annexin A4(Anxa4)
11749	Anxa6	48.5026	30.6258	-0.663315	0.00612393	annexin A6(Anxa6)
233071	Arhgap33	12.0578	17.5847	0.544358	0.00612393	Rho GTPase activating protein 33(Arhgap33)
109979	Art3	4.72326	2.59457	-0.864286	0.0424813	ADP-ribosyltransferase 3(Art3)
29810	Bag3	16.8876	10.1758	-0.730817	0.00612393	BCL2-associated athanogene 3(Bag3)
104382	Barhl2	0.285486	0.813698	1.51107	0.0190522	BarH-like 2 (Drosophila)(Barhl2)
58208	Bcl11b	1.80599	2.60115	0.526357	0.0457253	B cell leukemia/lymphoma 11B(Bcl11b)
242509	Bnc2	0.313215	0.677237	1.11251	0.00612393	basonuclin 2(Bnc2)
75770	Brsk2	37.57	175.489	2.22373	0.00612393	BR serine/threonine kinase 2(Brsk2)
320203	C130071C03Rik	53.1679	6.103	-3.12296	0.00612393	RIKEN cDNA C130071C03 gene(C130071C03Rik)
226359	C1ql2	4.98229	11.1763	1.16557	0.00612393	complement component 1, q subcomponent-like 2(C1ql2)
239659	C1ql4	9.37873	19.113	1.02709	0.00612393	complement component 1, q subcomponent-like 4(C1ql4)
237397	C2cd4c	1.18278	1.78728	0.595576	0.0190522	C2 calcium-dependent domain containing 4C(C2cd4c)
58226	Cacna1h	3.6347	5.58265	0.619114	0.00612393	calcium channel, voltage-dependent, T type, alpha 1H subunit(Cacna1h)
12294	Cacna2d3	14.2214	9.92973	-0.518236	0.0267922	calcium channel, voltage-dependent, alpha2/delta subunit 3(Cacna2d3)
12297	Cacnb3	14.4912	21.0974	0.541885	0.00612393	calcium channel, voltage-dependent, beta 3 subunit(Cacnb3)
12310	Calca	16.2152	5.30586	-1.61169	0.00612393	calcitonin/calcitonin-related polypeptide, alpha(Calca)
116903	Calcb	3.70928	1.3452	-1.46331	0.00612393	calcitonin-related polypeptide, beta(Calcb)
68566	Caly	79.6159	118.756	0.576871	0.00612393	calcyon neuron-specific vesicular protein(Caly)
12322	Camk2a	22.6878	33.7043	0.571016	0.00612393	calcium/calmodulin-dependent protein kinase II alpha(Camk2a)
12333	Capn1	12.4809	8.62966	-0.532342	0.0306196	calpain 1(Capn1)
12398	Cbfa2t3	2.08538	3.24636	0.638514	0.00612393	core-binding factor, runt domain, alpha subunit 2, translocated to, 3 (human)(Cbfa2t3)
12424	Cck	11.8521	20.7153	0.805555	0.00612393	cholecystokinin(Cck)
12484	Cd24a	17.0434	10.4832	-0.701134	0.00612393	CD24a antigen(Cd24a)
12561	Cdh4	3.82845	5.56387	0.539328	0.0190522	cadherin 4(Cdh4)
12585	Cdr2	20.5115	14.9053	-0.460609	0.0402512	cerebellar degeneration-related 2(Cdr2)
78784	Celf3	12.5194	19.0452	0.605266	0.0108525	CUGBP, Elav-like family member 3(Celf3)
108013	Celf4	96.3013	134.491	0.481886	0.0424813	CUGBP, Elav-like family member 4(Celf4)
319586	Celf5	13.0388	20.0905	0.623695	0.00612393	CUGBP, Elav-like family member 5(Celf5)
68178	Cgnl1	12.292	8.60023	-0.515267	0.00612393	cingulin-like 1(Cgnl1)
246048	Chodl	6.89024	2.441	-1.49708	0.00612393	chondrolectin(Chodl)
100910	Chpf2	16.5966	48.5373	1.54821	0.00612393	chondroitin polymerizing factor 2(Chpf2)
72978	Cnih3	2.86351	4.92345	0.781883	0.00612393	cornichon family AMPA receptor auxiliary protein 3(Cnih3)
269637	Cnpy1	1.25162	3.59263	1.52125	0.00612393	canopy FGF signaling regulator 1(Cnpy1)
12822	Col18a1	1.78494	2.67409	0.583175	0.0108525	collagen, type XVIII, alpha 1(Col18a1)
77018	Col25a1	3.62488	5.41089	0.577931	0.0108525	collagen, type XXV, alpha 1(Col25a1)
373864	Col27a1	3.92094	2.29033	-0.775646	0.00612393	collagen, type XXVII, alpha 1(Col27a1)
240058	Cpne5	4.88286	8.09884	0.72999	0.00612393	copine V(Cpne5)
69274	Ctdspl	5.04543	27.2328	2.43229	0.00612393	CTD (carboxy-terminal domain, RNA polymerase II, polypeptide A) small phosphatase-like(Ctdspl)
232174	Cyp26b1	9.88484	6.61737	-0.578959	0.00612393	cytochrome P450, family 26, subfamily b, polypeptide 1(Cyp26b1)
13166	Dbh	21.5936	11.2723	-0.937813	0.00612393	dopamine beta hydroxylase(Dbh)
13195	Ddc	21.2132	36.2121	0.771511	0.00612393	dopa decarboxylase(Ddc)
13199	Ddn	0.629445	1.85077	1.55598	0.00612393	dendrin(Ddn)
13207	Ddx5	387.416	175.935	-1.13884	0.0108525	DEAD (Asp-Glu-Ala-Asp) box polypeptide 5(Ddx5)
13347	Dffa	38.085	24.1786	-0.655496	0.00612393	DNA fragmentation factor, alpha subunit(Dffa)
13406	Dmp1	5.37701	3.01541	-0.834448	0.00612393	dentin matrix protein 1(Dmp1)
13447	Doc2b	5.66759	8.02897	0.502479	0.0424813	double C2, beta(Doc2b)
29861	Dpf1	7.55872	10.7527	0.508487	0.0339545	D4, zinc and double PHD fingers family 1(Dpf1)
13555	E2f1	3.8295	2.45744	-0.64	0.0339545	E2F transcription factor 1(E2f1)
13592	Ebf2	1.51315	2.35358	0.637307	0.0154015	early B cell factor 2(Ebf2)
13593	Ebf3	8.75455	12.5408	0.518527	0.0267922	early B cell factor 3(Ebf3)
13599	Ecel1	11.8942	7.8818	-0.593664	0.0108525	endothelin converting enzyme-like 1(Ecel1)
13653	Egr1	8.90361	16.2716	0.869895	0.00612393	early growth response 1(Egr1)
243312	Elfn1	11.5248	16.6241	0.528531	0.00612393	leucine rich repeat and fibronectin type III, extracellular 1(Elfn1)
329078	Emx2os	0.188859	0.935844	2.30896	0.00612393	Emx2 opposite strand/antisense transcript (non-protein coding)(Emx2os)
13798	En1	5.42824	10.5933	0.964591	0.00612393	engrailed 1(En1)
13799	En2	2.89549	6.13732	1.0838	0.00612393	engrailed 2(En2)
13871	Ercc2	8.84868	147.7	4.06107	0.00612393	excision repair cross-complementing rodent repair deficiency, complementation group 2(Ercc2)
23943	Esyt1	21.5142	15.1479	-0.506174	0.0154015	extended synaptotagmin-like protein 1(Esyt1)
219148	Fam167a	0.33114	0.699751	1.0794	0.0108525	family with sequence similarity 167, member A(Fam167a)
207215	Fbxo40	0.671652	0.302376	-1.15137	0.00612393	F-box protein 40(Fbxo40)
260298	Fev	1.99686	4.06838	1.02672	0.00612393	FEV (ETS oncogene family)(Fev)
14281	Fos	3.96618	6.68097	0.752306	0.00612393	FBJ osteosarcoma oncogene(Fos)
114142	Foxp2	1.8638	3.25238	0.803245	0.00612393	forkhead box P2(Foxp2)
14314	Fstl1	27.2161	16.7927	-0.696622	0.00612393	follistatin-like 1(Fstl1)
320267	Fubp3	61.07	11.1634	-2.45169	0.00612393	far upstream element (FUSE) binding protein 3(Fubp3)
14362	Fzd1	3.3858	5.01973	0.568114	0.0190522	frizzled class receptor 1(Fzd1)
14419	Gal	6.90491	3.85356	-0.841428	0.0402512	galanin(Gal)
271786	Galnt13	2.48534	3.52886	0.505759	0.0457253	UDP-N-acetyl-alpha-D-galactosamine:polypeptide N-acetylgalactosaminyltransferase 13(Galnt13)
14462	Gata3	4.6957	10.2393	1.12471	0.00612393	GATA binding protein 3(Gata3)
14528	Gch1	2.20884	3.69731	0.743186	0.0190522	GTP cyclohydrolase 1(Gch1)
320415	Gchfr	3.68315	7.18318	0.963682	0.0424813	GTP cyclohydrolase I feedback regulator(Gchfr)
14580	Gfap	30.5745	20.9691	-0.544065	0.00612393	glial fibrillary acidic protein(Gfap)
14555	Gpd1	32.1335	22.5176	-0.513027	0.0108525	glycerol-3-phosphate dehydrogenase 1 (soluble)(Gpd1)
245424	Gpr101	3.527	5.05584	0.51951	0.0339545	G protein-coupled receptor 101(Gpr101)
76206	Gpr165	9.27282	12.7144	0.455385	0.0424813	G protein-coupled receptor 165(Gpr165)
233919	Gpr26	3.40614	5.08232	0.57735	0.00612393	G protein-coupled receptor 26(Gpr26)
15114	Hap1	96.0982	133.585	0.475174	0.0190522	huntingtin-associated protein 1(Hap1)
15208	Hes5	6.18442	11.3977	0.882028	0.00612393	hairy and enhancer of split 5 (Drosophila)(Hes5)
103889	Hoxb2	2.71181	0.661024	-2.03648	0.00612393	homeobox B2(Hoxb2)
15410	Hoxb3	1.88576	0.323264	-2.54436	0.00612393	homeobox B3(Hoxb3)
15423	Hoxc4	0.85515	0.130369	-2.71357	0.0231716	homeobox C4(Hoxc4)
15434	Hoxd3	1.0961	0.0814675	-3.75001	0.0231716	homeobox D3(Hoxd3)
170638	Hpcal4	14.0942	20.8302	0.563578	0.00612393	hippocalcin-like 4(Hpcal4)
15507	Hspb1	16.7333	9.18226	-0.865799	0.00612393	heat shock protein 1(Hspb1)
80888	Hspb8	18.0004	9.66035	-0.897885	0.00612393	heat shock protein 8(Hspb8)
15898	Icam5	2.63836	4.47816	0.76326	0.00612393	intercellular adhesion molecule 5, telencephalin(Icam5)
93842	Igsf9	1.07336	1.93513	0.850304	0.00612393	immunoglobulin superfamily, member 9(Igsf9)
16330	Inpp5b	24.8412	11.6324	-1.09458	0.00612393	inositol polyphosphate-5-phosphatase B(Inpp5b)
16179	Irak1	30.0247	12.9812	-1.20972	0.00612393	interleukin-1 receptor-associated kinase 1(Irak1)
16370	Irs4	1.98609	3.43863	0.791904	0.00612393	insulin receptor substrate 4(Irs4)
16392	Isl1	1.10356	0.502733	-1.1343	0.0190522	ISL1 transcription factor, LIM/homeodomain(Isl1)
16485	Kcna1	45.9723	33.117	-0.473193	0.0339545	potassium voltage-gated channel, shaker-related subfamily, member 1(Kcna1)
66733	Kcng4	19.4028	13.204	-0.555286	0.0108525	potassium voltage-gated channel, subfamily G, member 4(Kcng4)
16562	Kif1c	86.0544	30.3776	-1.50224	0.0267922	kinesin family member 1C(Kif1c)
19144	Klk6	33.928	24.2008	-0.487424	0.0369194	kallikrein related-peptidase 6(Klk6)
57896	Krcc1	12.9603	8.60562	-0.590752	0.0486705	lysine-rich coiled-coil 1(Krcc1)
76161	Lamp5	60.9739	25.961	-1.23185	0.00612393	lysosomal-associated membrane protein family, member 5(Lamp5)
16814	Lbx1	3.24488	0.7293	-2.15358	0.00612393	ladybird homeobox homolog 1 (Drosophila)(Lbx1)
16852	Lgals1	24.1827	9.60568	-1.33201	0.00612393	lectin, galactose binding, soluble 1(Lgals1)
16870	Lhx2	1.43994	2.91024	1.01513	0.0339545	LIM homeobox protein 2(Lhx2)
16876	Lhx9	1.63955	4.50947	1.45966	0.00612393	LIM homeobox protein 9(Lhx9)
94352	Loxl2	46.9648	0.715388	-6.03671	0.00612393	lysyl oxidase-like 2(Loxl2)
74511	Lrrc17	74.387	114.23	0.618816	0.00612393	leucine rich repeat containing 17(Lrrc17)
23934	Ly6h	86.3007	136.464	0.661077	0.00612393	lymphocyte antigen 6 complex, locus H(Ly6h)
27385	Magel2	2.92413	4.37668	0.581826	0.0154015	melanoma antigen, family L, 2(Magel2)
74762	Mdga1	4.66767	6.72034	0.525831	0.0267922	MAM domain containing glycosylphosphatidylinositol anchor 1(Mdga1)
14013	Mecom	1.06455	0.617482	-0.785777	0.0231716	MDS1 and EVI1 complex locus(Mecom)
17395	Mmp9	1.62831	0.924323	-0.816909	0.0267922	matrix metallopeptidase 9(Mmp9)
433938	Mn1	5.34725	7.74014	0.533564	0.0190522	meningioma 1(Mn1)
380684	Nefh	253.371	123.415	-1.03773	0.00612393	neurofilament, heavy polypeptide(Nefh)
18039	Nefl	710.191	436.139	-0.703419	0.00612393	neurofilament, light polypeptide(Nefl)
18040	Nefm	557.039	277.657	-1.00447	0.00612393	neurofilament, medium polypeptide(Nefm)
18013	Neurod2	3.18396	1.64219	-0.955203	0.00612393	neurogenic differentiation 2(Neurod2)
68810	Nexn	6.92622	4.44787	-0.638954	0.0190522	nexilin(Nexn)
18096	Nkx6-1	2.82816	1.71323	-0.723148	0.00612393	NK6 homeobox 1(Nkx6-1)
225872	Npas4	1.39937	2.59638	0.891731	0.00612393	neuronal PAS domain protein 4(Npas4)
53324	Nptx2	1.61719	2.60582	0.688247	0.0402512	neuronal pentraxin 2(Nptx2)
64011	Nrgn	14.3571	44.0235	1.6165	0.00612393	neurogranin(Nrgn)
18186	Nrp1	5.38339	41.2653	2.93834	0.00612393	neuropilin 1(Nrp1)
18423	Otx1	0.663447	2.5764	1.9573	0.00612393	orthodenticle homeobox 1(Otx1)
18424	Otx2	0.328479	2.09598	2.67375	0.00612393	orthodenticle homeobox 2(Otx2)
74337	Palm3	4.79148	2.12947	-1.16998	0.00612393	paralemmin 3(Palm3)
11545	Parp1	103.607	11.5931	-3.15978	0.00612393	poly (ADP-ribose) polymerase family, member 1(Parp1)
18504	Pax2	5.89157	3.11238	-0.920636	0.00612393	paired box 2(Pax2)
18530	Pcdh8	5.55078	8.67046	0.643419	0.00612393	protocadherin 8(Pcdh8)
237823	Pfas	10.9024	25.0181	1.19833	0.0424813	phosphoribosylformylglycinamidine synthase (FGAR amidotransferase)(Pfas)
18935	Phox2b	4.37646	1.61127	-1.44157	0.00612393	paired-like homeobox 2b(Phox2b)
328734	Pisd-ps2	38.1427	54.7175	0.520595	0.0486705	phosphatidylserine decarboxylase, pseudogene 2(Pisd-ps2)
18740	Pitx1	0.203475	0.670876	1.7212	0.00612393	paired-like homeodomain transcription factor 1(Pitx1)
18741	Pitx2	0.508062	1.2592	1.30943	0.0190522	paired-like homeodomain transcription factor 2(Pitx2)
269437	Plch1	3.81105	5.34764	0.488715	0.0369194	phospholipase C, eta 1(Plch1)
269615	Plch2	4.75146	6.88397	0.53487	0.00612393	phospholipase C, eta 2(Plch2)
54712	Plxnc1	3.03495	4.52455	0.5761	0.0154015	plexin C1(Plxnc1)
18996	Pou4f1	0.434165	0.975942	1.16855	0.00612393	POU domain, class 4, transcription factor 1(Pou4f1)
18997	Pou4f2	0.397197	0.776633	0.96738	0.0369194	POU domain, class 4, transcription factor 2(Pou4f2)
19132	Prph	26.4358	10.15	-1.38102	0.00612393	peripherin(Prph)
73728	Psd	43.5319	64.0115	0.55626	0.0108525	pleckstrin and Sec7 domain containing(Psd)
19293	Pvalb	111.488	72.2762	-0.625297	0.00612393	parvalbumin(Pvalb)
58222	Rab37	9.79728	6.10265	-0.682944	0.00612393	RAB37, member RAS oncogene family(Rab37)
19352	Rabggtb	485.913	25.6231	-4.24518	0.00612393	Rab geranylgeranyl transferase, b subunit(Rabggtb)
56089	Ramp3	1.17898	2.67725	1.18321	0.0154015	receptor (calcitonin) activity modifying protein 3(Ramp3)
19725	Rfx2	0.436199	0.879006	1.01089	0.0154015	regulatory factor X, 2 (influences HLA class II expression)(Rfx2)
19736	Rgs4	27.9393	17.2752	-0.693596	0.00612393	regulator of G-protein signaling 4(Rgs4)
212108	Rln3	10.013	2.75771	-1.86033	0.00612393	relaxin 3(Rln3)
19885	Rorc	2.54802	1.44544	-0.81787	0.0154015	RAR-related orphan receptor gamma(Rorc)
68750	Rreb1	2.84642	3.98	0.483618	0.0486705	ras responsive element binding protein 1(Rreb1)
239405	Rspo2	1.17523	0.459732	-1.35408	0.00612393	R-spondin 2(Rspo2)
237847	Rtn4rl1	2.17054	3.82712	0.818209	0.00612393	reticulon 4 receptor-like 1(Rtn4rl1)
20194	S100a10	42.9894	29.5869	-0.53902	0.0306196	S100 calcium binding protein A10 (calpactin)(S100a10)
20269	Scn3a	4.66259	6.86762	0.558679	0.0108525	sodium channel, voltage-gated, type III, alpha(Scn3a)
399548	Scn4b	73.3523	50.1589	-0.548337	0.0154015	sodium channel, type IV, beta(Scn4b)
20271	Scn5a	0.425271	0.844182	0.98917	0.00612393	sodium channel, voltage-gated, type V, alpha(Scn5a)
20350	Sema3f	5.25583	8.44027	0.683372	0.0424813	sema domain, immunoglobulin domain (Ig), short basic domain, secreted, (semaphorin) 3F(Sema3f)
20370	Sez6	21.9399	29.8835	0.445789	0.0369194	seizure related gene 6(Sez6)
20377	Sfrp1	5.53255	3.68398	-0.586681	0.0306196	secreted frizzled-related protein 1(Sfrp1)
50795	Sh3bgr	15.7007	6.97204	-1.17118	0.00612393	SH3-binding domain glutamic acid-rich protein(Sh3bgr)
20473	Six3	0.694435	6.74958	3.28089	0.00612393	sine oculis-related homeobox 3(Six3)
100043902	Six3os1	0.157608	1.06986	2.76301	0.00612393	SIX homeobox 3, opposite strand 1(Six3os1)
108077	Skiv2l	112.188	18.4046	-2.60778	0.00612393	superkiller viralicidic activity 2-like (S. cerevisiae)(Skiv2l)
72961	Slc17a7	20.8907	7.64384	-1.45049	0.00612393	solute carrier family 17 (sodium-dependent inorganic phosphate cotransporter), member 7(Slc17a7)
104910	Slc25a47	23.1448	2.83413	-3.02971	0.00612393	solute carrier family 25, member 47(Slc25a47)
63993	Slc5a7	15.8134	11.1576	-0.503122	0.0306196	solute carrier family 5 (choline transporter), member 7(Slc5a7)
20538	Slc6a2	10.6129	5.02979	-1.07724	0.00612393	solute carrier family 6 (neurotransmitter transporter, noradrenalin), member 2(Slc6a2)
13162	Slc6a3	1.52547	9.76921	2.67899	0.00612393	solute carrier family 6 (neurotransmitter transporter, dopamine), member 3(Slc6a3)
15567	Slc6a4	10.1428	23.4286	1.20781	0.00612393	solute carrier family 6 (neurotransmitter transporter, serotonin), member 4(Slc6a4)
104245	Slc6a5	36.774	14.2546	-1.36726	0.00612393	solute carrier family 6 (neurotransmitter transporter, glycine), member 5(Slc6a5)
11989	Slc7a3	7.41157	11.0456	0.575616	0.0231716	solute carrier family 7 (cationic amino acid transporter, y+ system), member 3(Slc7a3)
110891	Slc8a2	8.68413	12.5161	0.527331	0.0190522	solute carrier family 8 (sodium/calcium exchanger), member 2(Slc8a2)
20562	Slit1	8.88594	13.3805	0.590533	0.00612393	slit homolog 1 (Drosophila)(Slit1)
20618	Sncg	150.33	102.72	-0.549419	0.00612393	synuclein, gamma(Sncg)
20669	Sox14	1.03652	2.27973	1.13711	0.00612393	SRY (sex determining region Y)-box 14(Sox14)
20750	Spp1	59.6442	24.3315	-1.29356	0.00612393	secreted phosphoprotein 1(Spp1)
269019	Stk32a	5.62485	3.31303	-0.763666	0.00612393	serine/threonine kinase 32A(Stk32a)
64176	Sv2b	20.7197	14.5801	-0.506998	0.0108525	synaptic vesicle glycoprotein 2 b(Sv2b)
75209	Sv2c	36.9228	26.109	-0.499964	0.0108525	synaptic vesicle glycoprotein 2c(Sv2c)
53420	Syt5	15.6014	24.5439	0.653685	0.00612393	synaptotagmin V(Syt5)
54524	Syt6	6.63624	9.75626	0.555962	0.0369194	synaptotagmin VI(Syt6)
21349	Tal1	2.36829	4.38694	0.889371	0.00612393	T cell acute lymphocytic leukemia 1(Tal1)
21416	Tcf7l2	3.48851	10.0046	1.51998	0.00612393	transcription factor 7 like 2, T cell specific, HMG box(Tcf7l2)
21823	Th	12.7815	22.5975	0.822106	0.00612393	tyrosine hydroxylase(Th)
380712	Tlcd2	12.7504	28.8015	1.1756	0.00612393	TLC domain containing 2(Tlcd2)
268567	Tmem229b	19.5097	13.7716	-0.5025	0.0369194	transmembrane protein 229B(Tmem229b)
79201	Tnfrsf23	1.16868	0.573569	-1.02684	0.00612393	tumor necrosis factor receptor superfamily, member 23(Tnfrsf23)
21956	Tnnt2	2.3497	4.38786	0.901039	0.0108525	troponin T2, cardiac(Tnnt2)
216343	Tph2	13.9907	27.8498	0.993195	0.00612393	tryptophan hydroxylase 2(Tph2)
22044	Trh	2.02349	4.36529	1.10924	0.00612393	thyrotropin releasing hormone(Trh)
210801	Unc5d	2.71583	3.77578	0.475378	0.0424813	unc-5 netrin receptor D(Unc5d)
22255	Uncx	2.91421	4.96578	0.768914	0.00612393	UNC homeobox(Uncx)
22355	Vipr2	1.28471	0.399024	-1.6869	0.00612393	vasoactive intestinal peptide receptor 2(Vipr2)
277432	Vstm2l	38.6875	59.8079	0.628468	0.00612393	V-set and transmembrane domain containing 2-like(Vstm2l)
75718	Vwa5b1	2.10539	3.70739	0.816314	0.0108525	von Willebrand factor A domain containing 5B1(Vwa5b1)
27762	Vwa7	6.42415	3.64619	-0.817117	0.00612393	von Willebrand factor A domain containing 7(Vwa7)
11906	Zfhx3	6.23639	8.52482	0.450958	0.0267922	zinc finger homeobox 3(Zfhx3)
22771	Zic1	4.5162	2.85629	-0.660968	0.0108525	zinc finger protein of the cerebellum 1(Zic1)
22776	Zim1	3.06384	4.55881	0.573316	0.0267922	zinc finger, imprinted 1(Zim1)
100041581	Zkscan16	9.35914	13.0846	0.483426	0.0190522	zinc finger with KRAB and SCAN domains 16(Zkscan16)

## Sheet: Supplementary _Table_5
Supplementary table 5. Genes making the maxium contribution to intergroup (winners versus losers) differences (correlation more than 0.90 or -0.90)
gene symbol	correlation	expression value, FPKM winners	expressionvalue, FPKM losers	log2 (fold_change) losers/winners	p_value	q_value	DEGs
Cacna1g	-0.996501	18.4472	25.77	0.48229	0.00215	0.120085
Scn5a	-0.989068	0.425271	0.844182	0.98917	5e-05	0.00612393	Scn5a
Aloxe3	-0.986899	1.00821	1.74456	0.791064	0.00045	0.0369194	Aloxe3
Fbxl18	-0.984792	8.90626	10.3112	0.211325	0.1448	0.894023
Elfn1	-0.983883	11.5248	16.6241	0.528531	5e-05	0.00612393	Elfn1
Plxnb2	-0.983667	7.81448	9.84527	0.333282	0.01075	0.32975
Rgs19	-0.982302	6.4007	8.53485	0.415136	0.17515	0.942037
Fbxw9	-0.981926	4.93497	6.68625	0.438157	0.42425	0.998873
Rimbp3	-0.980652	0.469291	0.679253	0.533465	0.01285	0.363596
Fermt3	-0.979256	1.92069	2.49648	0.378271	0.68335	0.998873
Radil	-0.976928	6.52998	8.33814	0.352647	0.0122	0.353965
Per3	-0.97521	6.11745	7.42472	0.279406	0.0568	0.706894
Lhx5	-0.975108	4.4262	6.14085	0.47237	0.00285	0.144583
Tstd3	-0.975022	0.960326	1.66748	0.796074	0.67145	0.998873
Icam5	-0.974839	2.63836	4.47816	0.76326	5e-05	0.00612393	Icam5
Letm2	-0.973894	11.0888	13.1741	0.248609	0.13455	0.88644
Dennd1a	-0.97208	1.37183	1.58747	0.210629	0.45435	0.998873
Ampd2	-0.970632	26.5185	30.3652	0.195422	0.132	0.884477
Zfp384	-0.970084	10.0534	11.5839	0.204443	0.1421	0.889916
Nudt16l1	-0.970065	15.6543	19.6628	0.328912	0.46635	0.998873
Asic4	-0.969563	4.82579	12.5569	1.37964	0.0358	0.595983
Cbfa2t3	-0.966065	2.08538	3.24636	0.638514	5e-05	0.00612393	Cbfa2t3
Rasa4	-0.965803	3.69412	5.3552	0.535708	0.00085	0.060729
A230065H16Rik	-0.964408	4.31321	9.8155	1.1863	5e-05	0.00612393	A230065H16Rik
Chrd	-0.963946	3.16233	4.46332	0.49713	0.0089	0.300239
Htr5a	-0.963881	2.22761	3.47343	0.640863	0.17105	0.939756
Doc2a	-0.963659	11.3577	16.3018	0.521359	0.2225	0.985831
Brd1	-0.963635	10.6763	12.2932	0.20344	0.135	0.88644
Gata3	-0.962776	4.6957	10.2393	1.12471	5e-05	0.00612393	Gata3
Rims3	-0.962448	32.1374	47.373	0.559813	0.00865	0.294874
Sema4a	-0.961768	14.6332	19.6319	0.423956	0.002	0.114313
Lhx1	-0.961706	2.98077	4.51209	0.598111	0.0101	0.320712
Dmrtb1	-0.96088	1.365	2.57679	0.916678	0.00125	0.0837256
Ubqln2	-0.960809	52.3926	63.5096	0.277609	0.03125	0.558171
Pxdn	-0.960534	4.4321	5.37971	0.279538	0.0409	0.627199
R3hdm1	-0.960223	18.9309	20.4591	0.112	0.3931	0.998873
Tef	-0.960112	44.8456	51.5277	0.200382	0.1212	0.867369
Zfp78	-0.959667	0.545258	0.706013	0.372755	0.1028	0.839795
Rbp1	-0.958866	1.11868	1.51153	0.434214	0.04415	0.648151
Invs	-0.958808	1.78831	2.22069	0.312409	0.1368	0.88644
Sgsm2	-0.958573	12.8176	16.8617	0.395626	0.08145	0.802782
Plcxd1	-0.957355	6.59613	9.38043	0.508033	0.003	0.149104
Aqr	-0.956559	7.67475	8.42079	0.133837	0.36215	0.998873
Emx2	-0.956474	0.163449	1.42631	3.12537	0.13025	0.881024
4933427D14Rik	-0.956251	5.30832	6.64504	0.32402	0.06655	0.749267
Caly	-0.955892	79.6159	118.756	0.576871	5e-05	0.00612393	Caly
Tssk6	-0.955786	0.867641	1.56966	0.855281	0.5081	0.998873
Fam183b	-0.955758	1.85709	2.88102	0.633537	0.06645	0.749267
Rbm33	-0.955523	9.13831	10.7865	0.239233	0.06435	0.739944
Zc3h12b	-0.954633	2.22078	2.84082	0.355242	0.32885	0.998873
Gaa	-0.953992	120.111	159.694	0.410944	0.00255	0.136214
Amz1	-0.953781	2.1593	3.18293	0.559789	0.41985	0.998873
Fam101a	-0.953722	0.397208	0.688604	0.793778	0.0259	0.517383
Zfp395	-0.953382	5.85614	7.35136	0.328061	0.02125	0.467645
Lysmd4	-0.953294	7.95951	9.19157	0.207632	0.19345	0.958693
Inha	-0.953009	13.5032	19.9084	0.560069	0.18285	0.947802
Trp53i11	-0.951731	17.7646	23.7031	0.416074	0.0028	0.143318
Dhrs3	-0.951724	6.85743	10.162	0.567448	0.00145	0.0917459
Per2	-0.950861	3.31748	4.12647	0.314818	0.0301	0.547903
Lrrtm1	-0.949764	9.38452	13.1262	0.484092	0.11055	0.85119
Ptch2	-0.9496	0.79576	1.43214	0.84777	0.01335	0.372822
Zfp444	-0.949575	10.719	12.5563	0.228249	0.1336	0.88644
Pcsk4	-0.949233	1.73882	2.70243	0.636146	0.88045	0.998873
Pi16	-0.949067	0.923677	1.4194	0.619821	0.06505	0.742618
Trerf1	-0.948919	6.77915	9.16335	0.434771	0.00195	0.112204
Pygo1	-0.948321	7.54108	9.558	0.341937	0.064	0.738498
Edn1	-0.948233	0.928799	1.10025	0.244388	0.32185	0.998873
Rapgefl1	-0.948166	13.7766	16.7773	0.284284	0.031	0.557188
Ryr1	-0.947741	0.653795	1.01505	0.634637	0.0091	0.301231
Ndst3	-0.947458	2.69853	3.2047	0.248011	0.1149	0.856609
Atf7ip	-0.946815	9.31166	10.6596	0.195045	0.17345	0.942037
Arhgap6	-0.945195	1.48216	2.0827	0.490751	0.00625	0.239216
Otx1	-0.944718	0.663447	2.5764	1.9573	5e-05	0.00612393	Otx1
Tenm3	-0.944403	3.79497	4.45398	0.231004	0.08525	0.8086
4930426D05Rik	-0.944215	1.44531	2.61875	0.857504	0.01725	0.42498
Nars2	-0.94417	2.98707	3.81205	0.351837	0.0761	0.78655
Baiap2	-0.943987	9.35171	12.5472	0.424062	0.01	0.318717
Epor	-0.943837	1.08793	1.83094	0.751003	0.0021	0.117675
Syt6	-0.943721	6.63624	9.75626	0.555962	0.00045	0.0369194	Syt6
Efs	-0.943416	5.44942	6.61139	0.278852	0.0611	0.727557
Jade1	-0.943252	13.1446	14.4603	0.137621	0.30235	0.998873
Celf3	-0.943128	12.5194	19.0452	0.605266	0.0001	0.0108525	Celf3
Fbxl16	-0.942715	49.0623	62.4579	0.34827	0.00605	0.235771
Prdm11	-0.942496	3.11343	3.56761	0.19645	0.36405	0.998873
Arhgef7	-0.94226	15.2235	17.3288	0.186866	0.16025	0.923388
Flcn	-0.942185	13.4878	14.5298	0.107359	0.417	0.998873
Krba1	-0.942117	4.60913	5.94184	0.366415	0.0097	0.314416
Six3	-0.942066	0.694435	6.74958	3.28089	5e-05	0.00612393	Six3
Ino80	-0.942018	6.08564	7.09409	0.221208	0.1752	0.942037
Csmd2	-0.941446	6.74688	9.03177	0.420788	0.0502	0.679921
Nphp4	-0.941242	2.70785	3.2344	0.256352	0.80825	0.998873
Ercc2	-0.941188	8.84868	147.7	4.06107	5e-05	0.00612393	Ercc2
Timm50	-0.941025	18.7611	21.3185	0.184358	0.2207	0.985419
Gcnt2	-0.940901	1.36934	2.09129	0.610912	0.1608	0.923388
Sbsn	-0.940228	10.4888	14.5006	0.467262	0.23375	0.988904
Cfap46	-0.94005	3.17063	4.01933	0.342189	0.06225	0.731096
Trrap	-0.939781	14.4228	18.0546	0.324019	0.0467	0.665565
Tal1	-0.939448	2.36829	4.38694	0.889371	5e-05	0.00612393	Tal1
Ldb2	-0.939316	7.0722	9.07377	0.359543	0.02245	0.484214
Bcl11b	-0.939306	1.80599	2.60115	0.526357	0.0006	0.0457253	Bcl11b
Scgn	-0.939202	0.363234	1.06589	1.55309	0.00145	0.0917459
Gm15800	-0.938772	20.4328	25.1448	0.299369	0.0214	0.468641
Zfp57	-0.938471	3.69003	5.76456	0.64358	0.18835	0.954466
Garnl3	-0.938337	15.4719	18.0869	0.225299	0.0982	0.835065
Pitx2	-0.937362	0.508062	1.2592	1.30943	0.0002	0.0190522	Pitx2
Cpne4	-0.937024	5.12173	6.39409	0.320108	0.0262	0.518168
Tcf20	-0.936676	12.1566	13.8379	0.186881	0.15245	0.914207
2310067B10Rik	-0.936355	13.2189	17.3857	0.395297	0.0193	0.447817
Dos	-0.935859	82.9372	118.662	0.516773	0.36185	0.998873
Dzip3	-0.935547	0.943207	1.46967	0.639849	0.45425	0.998873
Ebf4	-0.935381	7.44995	10.1767	0.449965	0.00235	0.127922
Zbtb46	-0.935343	1.62322	2.04078	0.33026	0.6786	0.998873
Pum1	-0.935266	14.5315	16.1276	0.150348	0.24745	0.991467
Zscan2	-0.934646	2.16051	2.7659	0.356376	0.05545	0.705199
Plk5	-0.934182	5.46998	8.67657	0.665589	0.83125	0.998873
Rps6kl1	-0.934167	10.9551	13.443	0.295256	0.3266	0.998873
Fiz1	-0.934156	6.00676	7.01041	0.222912	0.18045	0.946104
Arhgap20	-0.933857	1.01358	1.21466	0.261104	0.79855	0.998873
Psd	-0.933625	43.5319	64.0115	0.55626	0.0001	0.0108525	Psd
Gm10406	-0.933486	1.01255	2.66737	1.39743	0.04145	0.62842
Bbs1	-0.933387	4.39269	5.12675	0.222938	0.1177	0.862846
Ccnl2	-0.932985	21.6026	25.9654	0.265382	0.05255	0.688627
Sorcs2	-0.932947	7.37228	9.73143	0.400541	0.0027	0.13987
Pou2f1	-0.932886	2.9716	3.91056	0.396134	0.27625	0.998873
Slc16a14	-0.932739	1.50115	1.78884	0.252962	0.2547	0.995746
Acvr2b	-0.932716	3.73061	4.97838	0.416265	0.01225	0.354217
Plxna1	-0.932653	12.204	15.1464	0.311624	0.0166	0.418589
March4	-0.932528	3.5295	4.68523	0.408654	0.23575	0.988904
Lrtm2	-0.932243	15.9334	19.9943	0.327537	0.0215	0.469034
Dnah7a	-0.932178	0.782968	1.36483	0.801697	0.07095	0.767558
Serpina3f	-0.932077	1.03332	1.38031	0.4177	0.08055	0.802782
Smg6	-0.931829	10.7235	12.1473	0.179856	0.50705	0.998873
Otx2	-0.931513	0.328479	2.09598	2.67375	5e-05	0.00612393	Otx2
Zcchc14	-0.931512	7.77496	9.8286	0.338152	0.0131	0.36945
1700026D08Rik	-0.93142	0.271995	0.674209	1.30962	0.01125	0.338428
Glt8d2	-0.931239	0.383906	0.69903	0.864601	0.21335	0.982984
Lhx9	-0.931187	1.63955	4.50947	1.45966	5e-05	0.00612393	Lhx9
Htr1b	-0.930852	5.45436	6.49963	0.252947	0.1839	0.948979
Prr36	-0.930778	5.2025	7.64178	0.554702	0.09825	0.835065
Zfp319	-0.930435	4.68031	5.69418	0.282883	0.0782	0.795857
Ehmt1	-0.930319	6.95906	7.71138	0.148095	0.335	0.998873
Numbl	-0.930235	17.2956	22.9312	0.406905	0.00425	0.184961
Tigd5	-0.930223	1.04114	1.55743	0.580996	0.23875	0.988904
Auts2	-0.930142	9.18615	11.0773	0.270071	0.0423	0.632361
Fcho1	-0.92954	20.2952	25.0245	0.302201	0.0272	0.529168
Npas4	-0.929435	1.39937	2.59638	0.891731	5e-05	0.00612393	Npas4
Ramp3	-0.929343	1.17898	2.67725	1.18321	0.00015	0.0154015	Ramp3
Dpf1	-0.928762	7.55872	10.7527	0.508487	0.0004	0.0339545	Dpf1
Col25a1	-0.928731	3.62488	5.41089	0.577931	0.0001	0.0108525	Col25a1
Maea	-0.928662	40.8792	44.3238	0.116713	0.35925	0.998873
Hyi	-0.927993	9.97209	15.0555	0.594325	0.17495	0.942037
Igsf9	-0.927979	1.07336	1.93513	0.850304	5e-05	0.00612393	Igsf9
Hap1	-0.927829	96.0982	133.585	0.475174	0.0002	0.0190522	Hap1
Baiap3	-0.927596	27.1264	47.3611	0.804003	0.00315	0.153011
Crtc1	-0.927441	15.9193	20.5509	0.368426	0.00485	0.202343
Klhl32	-0.927216	4.4472	5.89375	0.406289	0.07775	0.793559
Zfp282	-0.927112	3.30931	3.94597	0.253849	0.08355	0.803946
Znrf3	-0.92694	1.69597	2.0979	0.306841	0.0567	0.706566
Jsrp1	-0.926436	0.665746	1.19839	0.848055	0.01545	0.405699
Lgi4	-0.926165	9.58427	11.194	0.223984	0.1385	0.88644
Rtn4rl1	-0.926099	2.17054	3.82712	0.818209	5e-05	0.00612393	Rtn4rl1
Kirrel	-0.925641	1.82455	2.75715	0.595636	0.01125	0.338428
Smpd3	-0.925629	4.06461	5.08431	0.322936	0.25425	0.995544
2410089E03Rik	-0.925597	9.80834	12.0814	0.300709	0.02895	0.540362
Adamts15	-0.925132	0.856998	1.30308	0.604564	0.00125	0.0837256
Evx2	-0.924391	1.91929	3.36431	0.809733	0.0009	0.062989
Pcdh8	-0.923964	5.55078	8.67046	0.643419	5e-05	0.00612393	Pcdh8
Fam110b	-0.923379	9.29724	10.8042	0.216722	0.14415	0.893886
Cited4	-0.923121	0.864895	1.37167	0.665335	0.03085	0.555973
Adcy6	-0.922443	8.15441	9.54088	0.226542	0.08595	0.8086
Crebbp	-0.921914	10.1249	12.0276	0.248435	0.06205	0.73075
Cpt1c	-0.921824	23.45	28.2953	0.270974	0.0411	0.627199
Elfn2	-0.921726	19.8152	24.4579	0.303693	0.02735	0.529312
Rfx1	-0.921659	4.62311	6.27227	0.440124	0.0185	0.44055
Pld6	-0.921658	1.48307	2.36791	0.675027	0.0029	0.144975
Enox1	-0.921597	4.40469	4.46286	0.0189282	0.90165	0.998873
Asxl3	-0.921593	0.70795	1.01791	0.523897	0.0019	0.110065
Zfp30	-0.921484	4.27815	4.9467	0.209477	0.16735	0.937071
Kcnb1	-0.921128	8.32781	10.1706	0.288397	0.02695	0.527525
Patz1	-0.921095	12.749	14.7075	0.206174	0.55645	0.998873
Magee1	-0.921063	59.1124	66.6201	0.172496	0.1738	0.942037
Ubxn10	-0.920975	0.853695	1.27928	0.583539	0.02385	0.499336
Hes5	-0.9209	6.18442	11.3977	0.882028	5e-05	0.00612393	Hes5
Pou6f2	-0.920641	1.26134	1.97485	0.646789	0.0034	0.161049
Traip	-0.920637	13.6667	21.1016	0.626691	5e-05	0.00612393
Tenm2	-0.920366	10.6614	14.4161	0.435289	0.01965	0.451056
Rnf138rt1	-0.920237	0.66095	1.05816	0.678946	0.04995	0.678141
Gli1	-0.92018	1.49806	2.20359	0.556759	0.00565	0.225304
Sh2d5	-0.918521	12.8383	15.5778	0.279034	0.04245	0.633499
C2cd4c	-0.918388	1.18278	1.78728	0.595576	0.0002	0.0190522	C2cd4c
Pitx1	-0.91837	0.203475	0.670876	1.7212	5e-05	0.00612393	Pitx1
Papln	-0.91811	0.901393	1.34196	0.57411	0.11045	0.850802
Cdca4	-0.91796	1.62273	2.01787	0.314416	0.14505	0.894023
Mmp17	-0.917952	10.8577	13.7607	0.341831	0.01255	0.359257
Man1a	-0.917733	3.07808	3.73836	0.280376	0.0838	0.804546
Gpc5	-0.91746	16.6888	18.8365	0.174649	0.1986	0.964701
Zfp775	-0.917217	2.00708	2.66727	0.410267	0.01255	0.359257
9130019O22Rik	-0.916976	0.564711	0.688614	0.286182	0.23155	0.988577
Rnf216	-0.916542	9.97103	11.7825	0.240834	0.10875	0.850743
Slit1	-0.916206	8.88594	13.3805	0.590533	5e-05	0.00612393	Slit1
Sez6	-0.915021	21.9399	29.8835	0.445789	0.00045	0.0369194	Sez6
Frmd4a	-0.914691	8.61318	9.16665	0.0898481	0.50015	0.998873
Syt5	-0.91448	15.6014	24.5439	0.653685	5e-05	0.00612393	Syt5
Celf5	-0.914466	13.0388	20.0905	0.623695	5e-05	0.00612393	Celf5
Cacna1b	-0.9143	12.1364	15.5691	0.359342	0.009	0.300239
Nlgn3	-0.914104	19.4572	23.3529	0.263296	0.0684	0.756681
Syngap1	-0.914035	13.5546	16.9853	0.325504	0.0739	0.775648
Fzd7	-0.914019	1.8319	2.05235	0.163936	0.32605	0.998873
Kcnd3	-0.913705	7.89732	11.1173	0.493376	0.00095	0.0654203
Lppr3	-0.913696	28.5306	40.8793	0.518862	0.64855	0.998873
Pnoc	-0.913678	7.77771	10.8422	0.479245	0.00135	0.0880169
4930539E08Rik	-0.913572	0.890274	1.33529	0.584832	0.0058	0.229683
Snx8	-0.913359	7.96255	10.164	0.352172	0.0159	0.411839
Cnot10	-0.91304	14.816	17.8017	0.264858	0.06275	0.732952
Trpc6	-0.912935	0.624433	1.06956	0.776402	0.0035	0.164423
Syt10	-0.912926	0.454137	0.734334	0.69331	0.166	0.93404
Mta1	-0.912593	17.8297	23.1343	0.37575	0.0048	0.201729
Hpca	-0.912458	68.9663	90.3307	0.389326	0.00265	0.138114
Ets2	-0.912391	9.93539	11.1755	0.169687	0.2078	0.977417
Hexa	-0.912194	19.4215	21.746	0.163096	0.226	0.987042
Foxa2	-0.912117	0.128325	0.785976	2.61469	0.0749	0.77837
Psme1	-0.912047	26.6665	34.4521	0.369562	0.1118	0.854674
Zfp618	-0.911948	2.14343	2.56348	0.258182	0.0756	0.782798
Slc29a2	-0.911879	6.12155	7.56471	0.305388	0.04425	0.648508
Slc8a2	-0.911845	8.68413	12.5161	0.527331	0.0002	0.0190522	Slc8a2
Pcdh10	-0.911499	22.9446	29.4087	0.35809	0.0169	0.424332
Vstm2l	-0.911358	38.6875	59.8079	0.628468	5e-05	0.00612393	Vstm2l
Spag6	-0.911157	0.639438	1.02839	0.685504	0.01205	0.353456
Camk2a	-0.911011	22.6878	33.7043	0.571016	5e-05	0.00612393	Camk2a
Bcor	-0.910885	7.45893	8.82024	0.241851	0.19125	0.95692
Agt	-0.910168	67.2843	90.5753	0.428848	0.00095	0.0654203
Tmem106c	-0.910128	27.8512	30.8815	0.149002	0.54	0.998873
En1	-0.910058	5.42824	10.5933	0.964591	5e-05	0.00612393	En1
Ptprf	-0.909156	15.9623	19.0421	0.254528	0.0457	0.658669
Col18a1	-0.909066	1.78494	2.67409	0.583175	0.0001	0.0108525	Col18a1
Ccdc159	-0.909043	33.4869	41.8983	0.323293	0.027	0.527901
Khdrbs2	-0.909011	3.84659	5.25263	0.44946	0.11655	0.86029
Nccrp1	-0.90896	0.33519	0.617295	0.880982	0.0297	0.545586
Kcnmb2	-0.908886	1.14502	1.56616	0.451868	0.0362	0.600145
Flrt1	-0.908879	7.72819	10.8216	0.485711	0.2905	0.998873
Sh2b2	-0.908658	2.46387	3.24595	0.397713	0.02515	0.51217
P4htm	-0.908525	85.9515	109.172	0.345008	0.03205	0.564231
Ttc13	-0.908419	8.87751	9.3399	0.0732525	0.63955	0.998873
Cacnb3	-0.908283	14.4912	21.0974	0.541885	5e-05	0.00612393	Cacnb3
Pnmal2	-0.907919	131.314	164.709	0.326893	0.0181	0.43527
Rgag4	-0.907893	9.33714	11.7664	0.333621	0.0699	0.764398
Ndn	-0.9078	195.349	245.813	0.331504	0.0143	0.383728
Mpp2	-0.906602	17.3622	21.1166	0.282428	0.0283	0.535962
Fam163b	-0.906466	12.1213	14.9363	0.301288	0.02605	0.517383
Cpe	-0.906346	372.805	470.264	0.335052	0.01405	0.379993
Pla2g15	-0.906265	5.40776	6.23403	0.205133	0.18045	0.946104
Nr6a1	-0.906059	1.5596	1.84671	0.243783	0.1449	0.894023
Krt77	-0.905907	0.545911	1.06549	0.964778	0.00105	0.0711634
Slc24a3	-0.905858	21.6951	26.2694	0.276011	0.03525	0.590265
Celsr3	-0.905224	9.38325	12.2591	0.38569	0.00265	0.138114
Nphp3	-0.905161	3.7364	4.27638	0.194743	0.23155	0.988577
Nrgn	-0.905143	14.3571	44.0235	1.6165	5e-05	0.00612393	Nrgn
Gltscr1l	-0.904956	15.7109	18.6313	0.245959	0.07195	0.771079
Sox14	-0.904803	1.03652	2.27973	1.13711	5e-05	0.00612393	Sox14
Islr2	-0.90423	1.0005	1.52737	0.610324	0.0021	0.117675
Jade2	-0.90373	10.2578	12.3953	0.273067	0.0483	0.67254
Ly6h	-0.903514	86.3007	136.464	0.661077	5e-05	0.00612393	Ly6h
Rapgef2	-0.903433	11.1352	12.7121	0.191074	0.14	0.886761
Plxnc1	-0.903306	3.03495	4.52455	0.5761	0.00015	0.0154015	Plxnc1
Sprn	-0.902897	4.96021	6.76715	0.448145	0.03245	0.568969
Vwa5b1	-0.902813	2.10539	3.70739	0.816314	0.0001	0.0108525	Vwa5b1
Prrc1	-0.902733	6.35437	8.39644	0.402028	0.11375	0.856609
B4galnt4	-0.902521	14.7865	19.0275	0.363799	0.00595	0.233466
Rnf166	-0.902069	9.01882	10.9339	0.277793	0.07695	0.789705
Rasgef1a	-0.902041	22.0429	25.4304	0.206241	0.11505	0.856609
Fam84b	-0.90188	0.774571	1.0014	0.370553	0.07655	0.789705
Nog	-0.901764	1.30769	2.15437	0.720248	0.0016	0.0976342
Tnfrsf18	-0.901396	2.35503	2.94626	0.32314	0.1357	0.88644
Klhdc8b	-0.901098	5.04577	6.79588	0.429585	0.09775	0.834328
Deaf1	-0.901092	13.4928	17.4148	0.368125	0.09925	0.835065
Itm2c	-0.900939	183.049	222.405	0.280963	0.0318	0.562443
Hdac7	-0.900797	8.26761	10.5336	0.349457	0.224	0.986878
Magel2	-0.900553	2.92413	4.37668	0.581826	0.00015	0.0154015	Magel2
Foxp2	-0.900513	1.8638	3.25238	0.803245	5e-05	0.00612393	Foxp2
Plekha7	-0.900431	3.7281	5.1715	0.472141	0.0013	0.0863996
Ppap2b	-0.900397	55.7562	67.1326	0.26788	0.03665	0.60162
Txnrd1	0.900159	21.5296	19.7079	-0.127546	0.33275	0.998873
Psmd12	0.900458	50.6303	44.359	-0.190776	0.13845	0.88644
Tlk2	0.900735	13.5616	11.9412	-0.18357	0.1999	0.965814
Arel1	0.900788	14.8819	13.2075	-0.172203	0.18515	0.950986
Hspa12a	0.901424	40.2317	34.9374	-0.203564	0.1155	0.856609
Ephx1	0.901432	18.8659	15.8511	-0.251202	0.07165	0.768825
Eif1b	0.901525	122.213	109.256	-0.161687	0.21455	0.983949
Krt222	0.901672	14.2969	12.1014	-0.240523	0.0824	0.803916
Fam78b	0.901723	6.59456	5.35301	-0.300927	0.05905	0.71688
Parp4	0.902075	2.09223	1.7565	-0.252338	0.11435	0.856609
Acyp2	0.902143	58.2813	50.4514	-0.208139	0.3348	0.998873
Adcy9	0.902498	12.7839	11.5646	-0.144614	0.3093	0.998873
Polr3g	0.902559	2.80271	1.90441	-0.557475	0.0026	0.136755
H2-Ab1	0.902631	1.24066	0.739793	-0.74591	0.02035	0.457928
Rgs4	0.902664	27.9393	17.2752	-0.693596	5e-05	0.00612393	Rgs4
Rap2a	0.902822	16.2997	15.4054	-0.0814064	0.5308	0.998873
Gbp3	0.903308	2.21643	1.61258	-0.458864	0.01925	0.447263
Eya2	0.903455	5.0895	3.81152	-0.417159	0.01365	0.376297
Sfrp1	0.903531	5.53255	3.68398	-0.586681	0.00035	0.0306196	Sfrp1
Abhd6	0.903534	17.3289	13.3326	-0.378225	0.01265	0.360914
Adora1	0.903663	39.2746	31.0177	-0.340505	0.01055	0.325947
1700021F05Rik	0.903798	25.6954	20.1079	-0.35375	0.01955	0.451056
Lat2	0.904045	1.28657	0.802538	-0.68089	0.0165	0.418529
Nmd3	0.904331	8.21116	7.2765	-0.174341	0.2688	0.998873
Hist1h2bc	0.904426	27.1689	20.7784	-0.386874	0.01335	0.372822
Dnajc7	0.904655	59.4248	51.2791	-0.212692	0.55085	0.998873
Gm10220	0.90504	3.15143	2.38429	-0.402445	0.25395	0.995544
Rit1	0.905839	9.24677	7.84562	-0.237062	0.1039	0.840018
Sdf4	0.905851	80.8073	77.531	-0.0597111	0.74305	0.998873
Rnase1	0.906058	1.70347	1.12034	-0.604546	0.05915	0.71688
Rbpms	0.906459	1.73997	1.403	-0.310551	0.2621	0.998873
Kcnj10	0.907757	115.64	92.9952	-0.314407	0.02085	0.464305
Lias	0.90776	19.6042	16.843	-0.219014	0.1196	0.866665
Anp32a	0.907991	54.9234	49.4561	-0.151271	0.23545	0.988904
Grb14	0.908444	13.777	12.5616	-0.133239	0.34645	0.998873
Scn4b	0.908722	73.3523	50.1589	-0.548337	0.00015	0.0154015	Scn4b
Atp5f1	0.909171	128.213	115.007	-0.156821	0.29445	0.998873
Bpgm	0.909257	32.2504	29.6914	-0.119271	0.36285	0.998873
Antxr1	0.909496	4.28866	4.14339	-0.0497175	0.73625	0.998873
Msh5	0.909562	6.33059	2.854	-1.14936	0.00535	0.21585
Knop1	0.909777	6.88237	6.06888	-0.181475	0.70145	0.998873
Snap25	0.910314	1170.36	920.311	-0.346764	0.0288	0.539709
Bmp2k	0.91033	6.54095	5.73033	-0.190883	0.28605	0.998873
Hoxa1	0.910445	1.83806	0.346685	-2.40649	5e-05	0.00612393
Klk6	0.910563	33.928	24.2008	-0.487424	0.00045	0.0369194	Klk6
Ahcyl2	0.911305	43.4995	37.9011	-0.19876	0.12635	0.873951
Rorc	0.911344	2.54802	1.44544	-0.81787	0.00015	0.0154015	Rorc
Smap2	0.911534	61.7216	57.4236	-0.104133	0.40925	0.998873
Nfkbie	0.91175	1.1735	0.764894	-0.617488	0.0119	0.3506
Mitf	0.911781	2.51574	2.06947	-0.281721	0.0799	0.802134
Tpx2	0.913245	0.790052	0.557419	-0.503185	0.0258	0.517383
Ndufb3	0.913793	151.085	116.584	-0.373983	0.00635	0.241427
Nars	0.914047	91.6475	78.1592	-0.22968	0.0766	0.789705
Rnf141	0.914888	22.8884	21.3946	-0.0973672	0.60955	0.998873
Hoxb3	0.914908	1.88576	0.323264	-2.54436	5e-05	0.00612393	Hoxb3
Rassf3	0.915773	6.9916	5.37931	-0.378203	0.0102	0.322693
M6pr	0.916312	41.3458	38.8704	-0.0890669	0.61625	0.998873
Cpsf2	0.916327	72.8224	59.6033	-0.288989	0.1716	0.939756
Ptpn3	0.916329	4.12456	3.21422	-0.359772	0.01315	0.370251
Lamtor5	0.916577	39.2744	35.6654	-0.139066	0.32695	0.998873
Pdlim2	0.916764	28.6401	23.074	-0.311772	0.02945	0.543573
Pcdh9	0.917488	34.9013	30.4286	-0.197856	0.12775	0.875817
Plcd4	0.917673	12.1238	10.3284	-0.231227	0.38695	0.998873
Ndufa5	0.917889	161.1	131.313	-0.294945	0.02425	0.502799
Setd7	0.918114	25.7858	23.4863	-0.134762	0.2995	0.998873
Dchs1	0.918179	1.72826	0.849986	-1.02381	0.1756	0.943595
Pop5	0.91818	36.8851	28.1366	-0.390589	0.0164	0.416609
Asap1	0.918258	18.1489	16.8096	-0.110601	0.38795	0.998873
Arhgap30	0.918314	0.731992	0.614055	-0.253462	0.2522	0.995047
Fam114a1	0.918645	2.003	1.67192	-0.260658	0.16855	0.938353
Parva	0.918658	26.4008	21.6893	-0.283599	0.0305	0.552253
Msrb1	0.918941	24.1797	18.3143	-0.400825	0.0104	0.323646
Meis1	0.919011	8.28991	6.43826	-0.364685	0.01235	0.355311
Tnfsf13b	0.919104	3.20342	2.383	-0.426834	0.0411	0.627199
Polr2k	0.919674	22.7974	18.9392	-0.267492	0.1438	0.893707
Dnajb11	0.919824	23.0054	21.3429	-0.108215	0.416	0.998873
Slc6a15	0.919938	22.6942	20.0191	-0.180945	0.37	0.998873
Slc6a5	0.920005	36.774	14.2546	-1.36726	5e-05	0.00612393	Slc6a5
Chchd2	0.920033	136.571	118.806	-0.201046	0.11545	0.856609
Tsc22d3	0.920072	67.9431	55.487	-0.292179	0.02145	0.469034
Kcnd1	0.920341	4.98591	4.04367	-0.302191	0.07275	0.773369
Myh6	0.920845	3.62947	1.79557	-1.01532	0.30405	0.998873
Tnfrsf13c	0.920985	0.65099	0.425849	-0.612292	0.06575	0.745374
Lgi2	0.921719	31.2482	25.0522	-0.318836	0.01345	0.373788
Tdrkh	0.92173	23.0963	18.039	-0.356546	0.08765	0.813348
Atp6v1d	0.921808	107.548	97.1219	-0.14711	0.33915	0.998873
Ifi35	0.922594	1.84055	1.2386	-0.571428	0.02605	0.517383
Mrps31	0.922779	10.3634	9.45349	-0.132583	0.39565	0.998873
Hsph1	0.923198	80.2809	66.4371	-0.273067	0.0367	0.60162
Car7	0.923436	5.486	3.73137	-0.556051	0.00375	0.171014
Mien1	0.923938	55.7224	50.5902	-0.139399	0.32645	0.998873
Zbtb32	0.924112	0.757759	0.547389	-0.469172	0.0621	0.730836
Cnst	0.924113	10.964	9.97765	-0.136005	0.2974	0.998873
Zfyve9	0.924125	26.3847	22.7712	-0.212486	0.3459	0.998873
Tnfrsf21	0.924271	37.1354	32.1639	-0.207354	0.10195	0.839795
Meis2	0.924833	7.66892	4.82769	-0.66769	0.1412	0.889092
Aff3	0.925617	11.1267	10.4582	-0.089388	0.6419	0.998873
Stmn2	0.926281	225.632	188.514	-0.259302	0.0484	0.67254
Pdhx	0.926526	14.881	12.9318	-0.202548	0.1404	0.887045
Dpy19l1	0.926638	28.8108	27.1583	-0.0852148	0.5427	0.998873
Cald1	0.926649	8.96751	7.40557	-0.276097	0.0433	0.642642
Ccdc152	0.926892	0.614971	0.333357	-0.883449	0.1527	0.914207
Cpm	0.926963	5.10266	4.29257	-0.249409	0.0811	0.802782
Stambp	0.92725	11.774	11.1912	-0.0732433	0.61525	0.998873
Wnt3	0.927288	2.76359	2.27575	-0.280203	0.1056	0.843374
Mcu	0.927424	9.80915	8.4419	-0.216559	0.12605	0.873951
Mog	0.927625	83.325	68.1679	-0.289656	0.04015	0.624021
Irak2	0.928579	7.0359	5.70848	-0.301629	0.0472	0.66722
Atp5j	0.928641	309.086	235.634	-0.391464	0.0048	0.201729
Glud1	0.928751	102.891	95.2682	-0.111049	0.40675	0.998873
Fgf1	0.928795	63.4197	46.2748	-0.454703	0.00615	0.236975
Kcna1	0.929277	45.9723	33.117	-0.473193	0.0004	0.0339545	Kcna1
St3gal1	0.929767	5.5116	4.09784	-0.427607	0.0022	0.121297
Rimkla	0.929867	20.853	16.2439	-0.360357	0.0048	0.201729
Ankdd1b	0.930252	2.51043	1.77944	-0.496514	0.1094	0.850743
Sh3bgr	0.930295	15.7007	6.97204	-1.17118	5e-05	0.00612393	Sh3bgr
Eif2ak2	0.93043	5.47252	4.39529	-0.316249	0.052	0.684826
Cmas	0.930514	64.9324	56.5725	-0.198836	0.12095	0.866665
Traf5	0.930573	0.62696	0.456604	-0.457429	0.13255	0.884974
Atp8a2	0.931633	11.8826	10.5955	-0.165399	0.21435	0.983795
Pcolce2	0.931722	8.49884	7.60846	-0.159662	0.3301	0.998873
Dpf2	0.931805	16.7741	15.559	-0.108482	0.41305	0.998873
Prkd1	0.93186	2.35201	2.17388	-0.113626	0.5965	0.998873
Igsf11	0.932316	8.44637	6.88867	-0.294105	0.0392	0.616663
Adm	0.932353	2.49238	1.83723	-0.439992	0.05875	0.715473
3632451O06Rik	0.932869	16.6057	12.953	-0.358393	0.0199	0.453624
Cdv3	0.935034	26.5001	23.882	-0.150072	0.2525	0.995195
Plekha3	0.935905	11.745	9.64707	-0.283879	0.0423	0.632361
Entpd3	0.93665	8.78281	6.5655	-0.419779	0.0038	0.172834
Msh3	0.936772	4.06476	3.55761	-0.192263	0.2807	0.998873
Paics	0.9368	40.0545	34.7552	-0.204738	0.13555	0.88644
Rassf4	0.936933	9.72467	8.40931	-0.209663	0.1131	0.856609
Pcyt1b	0.937245	16.1705	12.044	-0.425044	0.00135	0.0880169
Pak1	0.937649	97.3335	82.2192	-0.243461	0.061	0.727557
Eaf1	0.938105	7.53201	6.47403	-0.218371	0.1166	0.86029
Oprd1	0.938631	3.2425	2.2263	-0.542458	0.0222	0.480636
Gsta4	0.938833	58.3995	50.8131	-0.200758	0.12785	0.875817
Anxa7	0.938933	18.4611	15.3904	-0.262461	0.0486	0.673485
Nop9	0.938972	2.22959	1.95255	-0.191422	0.3529	0.998873
Rad18	0.939251	1.95756	1.50305	-0.38116	0.0674	0.752061
Lsm11	0.939252	6.21012	5.23691	-0.245908	0.07185	0.770489
Zswim6	0.939263	7.11531	6.69963	-0.0868453	0.5283	0.998873
Fstl1	0.939561	27.2161	16.7927	-0.696622	5e-05	0.00612393	Fstl1
Dusp3	0.939748	41.4684	37.5664	-0.142572	0.27085	0.998873
Bend7	0.940082	2.77276	2.12955	-0.380773	0.0244	0.504689
9130023H24Rik	0.940301	0.976995	0.806275	-0.27708	0.5576	0.998873
Ss18	0.940435	9.5406	8.37817	-0.187446	0.18515	0.950986
Tnfrsf23	0.940856	1.16868	0.573569	-1.02684	5e-05	0.00612393	Tnfrsf23
Gfod1	0.940925	11.3441	8.70943	-0.381292	0.00415	0.181995
Eif2b5	0.94181	16.4189	14.7038	-0.159169	0.2417	0.988904
Elovl1	0.941947	16.0511	13.3027	-0.270955	0.10015	0.836186
Tpt1	0.942463	494.67	432.172	-0.194859	0.1328	0.884974
Ppm1e	0.942534	19.5063	16.2527	-0.263266	0.571	0.998873
Lgals9	0.942588	4.35892	3.30134	-0.400919	0.04555	0.658
Fcf1	0.942928	20.2734	16.8972	-0.262804	0.1149	0.856609
Cebpz	0.943354	8.74455	7.57238	-0.207636	0.1886	0.954466
Agpat6	0.943413	21.4033	20.1537	-0.0867893	0.50025	0.998873
Hspa8	0.944203	944.07	868.75	-0.119953	0.44165	0.998873
Plekhf2	0.944422	1.94302	1.63817	-0.24622	0.2161	0.985333
P2rx6	0.944829	5.76094	3.40625	-0.75812	0.02725	0.529168
Nme1	0.945049	70.7149	62.2335	-0.184322	0.15125	0.910633
Adipor2	0.945478	22.5349	18.6633	-0.271953	0.0365	0.601216
Cacna2d3	0.945768	14.2214	9.92973	-0.518236	0.0003	0.0267922	Cacna2d3
Mreg	0.945771	4.56559	3.92759	-0.217157	0.1883	0.954466
Dusp15	0.945852	23.7036	19.5877	-0.275157	0.18265	0.94757
Tshz3	0.945988	3.6753	1.87457	-0.971308	0.0012	0.0810094
Onecut2	0.94622	2.79673	2.10998	-0.406512	0.05005	0.678425
Gtf3c6	0.946984	14.7321	13.1107	-0.168227	0.3384	0.998873
Cs	0.947005	88.5225	80.1421	-0.143483	0.2982	0.998873
Slc22a4	0.947286	8.83743	8.1931	-0.109217	0.4767	0.998873
Bcap31	0.947377	62.6483	54.8904	-0.190721	0.1407	0.887958
Atp5l	0.947399	262.729	228.228	-0.203099	0.11695	0.86029
Sept6	0.948639	20.1223	18.1957	-0.145193	0.2688	0.998873
Slirp	0.949029	93.233	77.0571	-0.274913	0.32675	0.998873
Tdgf1	0.949302	0.754534	0.366671	-1.0411	0.00455	0.195536
4833439L19Rik	0.949699	48.2734	45.637	-0.0810242	0.5741	0.998873
Rtn4ip1	0.950061	6.70339	5.43779	-0.301871	0.0899	0.816481
Sv2b	0.950612	20.7197	14.5801	-0.506998	0.0001	0.0108525	Sv2b
Angptl2	0.950907	1.40664	0.960402	-0.550539	0.36805	0.998873
Slc44a1	0.95129	37.6395	32.4386	-0.214536	0.09875	0.835065
Jak1	0.951307	25.4578	22.2513	-0.194218	0.14125	0.889092
Immp2l	0.952254	2.47041	1.89414	-0.383203	0.498	0.998873
Stk39	0.952487	40.0899	30.1518	-0.410996	0.0013	0.0863996
Eif2ak1	0.952744	27.6935	24.5144	-0.175919	0.24195	0.988904
Mppe1	0.953565	6.25809	5.5561	-0.171649	0.73775	0.998873
Tmem229b	0.955672	19.5097	13.7716	-0.5025	0.00045	0.0369194	Tmem229b
Ubqln1	0.956195	58.0444	55.4479	-0.0660237	0.6089	0.998873
Hbs1l	0.956747	15.6564	13.9928	-0.162062	0.2464	0.991467
Trim36	0.957092	6.58066	5.45963	-0.26943	0.0557	0.705199
Glrx	0.957727	36.9333	29.3399	-0.332054	0.0123	0.355064
Fam131b	0.958714	20.3502	17.5465	-0.213864	0.1039	0.840018
Endod1	0.959063	65.1198	53.6381	-0.279839	0.03115	0.558171
Hoxa4	0.959108	0.923714	0.117961	-2.96914	0.05135	0.682557
Uap1	0.959248	18.6942	15.3939	-0.280228	0.0391	0.616442
Zcchc10	0.959355	6.11747	5.23936	-0.223543	0.23075	0.987867
Glo1	0.95962	58.1046	52.7363	-0.139854	0.34565	0.998873
Senp2	0.959698	20.243	17.9721	-0.171664	0.18185	0.94631
Psmd2	0.959781	73.1729	66.4955	-0.138052	0.2799	0.998873
Calr3	0.960653	3.76016	2.64969	-0.504971	0.01625	0.415879
Osbpl1a	0.961108	52.8102	42.3304	-0.319121	0.01935	0.448371
Stau2	0.961441	48.0867	43.4783	-0.145344	0.2641	0.998873
Spp1	0.962531	59.6442	24.3315	-1.29356	5e-05	0.00612393	Spp1
Adam23	0.963477	42.1207	33.1259	-0.346569	0.00855	0.292628
Katnal1	0.964022	22.4698	21.2952	-0.0774624	0.54465	0.998873
AF529169	0.964434	3.38662	3.10469	-0.125398	0.37865	0.998873
Ccdc77	0.964919	2.11338	1.65557	-0.352225	0.4383	0.998873
Ppp3cc	0.965615	7.81746	6.50442	-0.265279	0.09375	0.825645
Oxct1	0.966624	59.7001	51.9189	-0.201473	0.1254	0.873951
Sync	0.967101	2.5351	1.68066	-0.593012	0.36535	0.998873
Morf4l1	0.967282	139.202	116.596	-0.255663	0.04645	0.662627
Tbx18	0.968301	0.978329	0.742607	-0.39772	0.0556	0.705199
Psmb7	0.968336	137.534	119.596	-0.201617	0.1149	0.856609
Msantd2	0.968576	6.51261	6.49756	-0.0033391	0.98515	0.998873
March3	0.969751	2.74631	2.12313	-0.371301	0.09965	0.835958
Cd99l2	0.969878	33.9713	30.4737	-0.156751	0.21635	0.985333
Timmdc1	0.969917	12.6911	11.3907	-0.155969	0.27845	0.998873
Iars	0.97046	16.8052	15.1869	-0.146083	0.2582	0.998873
Esrrg	0.971419	15.3417	11.5986	-0.403501	0.0021	0.117675
Sdhaf2	0.976599	9.33493	7.69237	-0.27921	0.28725	0.998873
Ndrg3	0.979528	121.321	103.966	-0.22272	0.08265	0.803916
Gnal	0.981154	31.8923	29.6664	-0.104381	0.45415	0.998873
S100a10	0.981614	42.9894	29.5869	-0.53902	0.00035	0.0306196	S100a10
Mrps2	0.983184	13.2522	11.7123	-0.178209	0.21035	0.979596
Pik3c3	0.984358	13.5669	12.5188	-0.115989	0.3928	0.998873
Sh3gl2	0.989296	92.2029	76.3926	-0.271379	0.03625	0.600145

## Sheet: Supplementary _Table_6
Supplementary Table 6. DEGs characterized by correlation more than 0.90 or -0.90
gene ID	DEGs in winners/losers comparison	r (correlation)	behavior / neurological phenotype	abnormal emotion/affect behavior	abnormal aggression-related behavior	increased aggression	increased aggression towards mice	abnormal depression-related behavior	abnormal fear/anxiety-related behavior	transcription factor genes	expression changed bi_directionally	gene symbol	fpkm in control mice	fpkm in VTA of winners	fpkm in VTA of losers	log2(fold_change) Losers/winners	q_value	Name
20271	Scn5a	-0.989068	Scn5a									Scn5a	0.468598	0.425271	0.844182	0.98917	0.00612393	sodium channel, voltage-gated, type V, alpha(Scn5a)
23801	Aloxe3	-0.986899										Aloxe3	0.838121	1.00821	1.74456	0.791064	0.0369194	arachidonate lipoxygenase 3(Aloxe3)
243312	Elfn1	-0.983883										Elfn1	13.8096	11.5248	16.6241	0.528531	0.00612393	leucine rich repeat and fibronectin type III, extracellular 1(Elfn1)
15898	Icam5	-0.974839	Icam5									Icam5	2.64388	2.63836	4.47816	0.76326	0.00612393	intercellular adhesion molecule 5, telencephalin(Icam5)
12398	Cbfa2t3	-0.966065								Cbfa2t3		Cbfa2t3	2.45065	2.08538	3.24636	0.638514	0.00612393	core-binding factor, runt domain, alpha subunit 2, translocated to, 3 (human)(Cbfa2t3)
380787	A230065H16Rik	-0.964408										A230065H16Rik	5.58758	4.31321	9.8155	1.1863	0.00612393	RIKEN cDNA A230065H16 gene(A230065H16Rik)
14462	Gata3	-0.962776								Gata3		Gata3	5.57502	4.6957	10.2393	1.12471	0.00612393	GATA binding protein 3(Gata3)
68566	Caly	-0.955892										Caly	86.4552	79.6159	118.756	0.576871	0.00612393	calcyon neuron-specific vesicular protein(Caly)
18423	Otx1	-0.944718								Otx1		Otx1	0.620819	0.663447	2.5764	1.9573	0.00612393	orthodenticle homeobox 1(Otx1)
54524	Syt6	-0.943721										Syt6	6.33376	6.63624	9.75626	0.555962	0.0369194	synaptotagmin VI(Syt6)
78784	Celf3	-0.943128										Celf3	13.4349	12.5194	19.0452	0.605266	0.0108525	CUGBP, Elav-like family member 3(Celf3)
20473	Six3	-0.942066								Six3	Six3	Six3	1.92941	0.694435	6.74958	3.28089	0.00612393	sine oculis-related homeobox 3(Six3)
13871	Ercc2	-0.941188	Ercc2	Ercc2						Ercc2	Ercc2	Ercc2	52.512	8.84868	147.7	4.06107	0.00612393	excision repair cross-complementing rodent repair deficiency, complementation group 2(Ercc2)
21349	Tal1	-0.939448								Tal1		Tal1	2.44588	2.36829	4.38694	0.889371	0.00612393	T cell acute lymphocytic leukemia 1(Tal1)
58208	Bcl11b	-0.939306	Bcl11b							Bcl11b		Bcl11b	1.90272	1.80599	2.60115	0.526357	0.0457253	B cell leukemia/lymphoma 11B(Bcl11b)
18741	Pitx2	-0.937362	Pitx2							Pitx2		Pitx2	0.431575	0.508062	1.2592	1.30943	0.0190522	paired-like homeodomain transcription factor 2(Pitx2)
73728	Psd	-0.933625										Psd	49.294	43.5319	64.0115	0.55626	0.0108525	pleckstrin and Sec7 domain containing(Psd)
18424	Otx2	-0.931513	Otx2							Otx2	Otx2	Otx2	0.725079	0.328479	2.09598	2.67375	0.00612393	orthodenticle homeobox 2(Otx2)
16876	Lhx9	-0.931187								Lhx9		Lhx9	1.91528	1.63955	4.50947	1.45966	0.00612393	LIM homeobox protein 9(Lhx9)
225872	Npas4	-0.929435										Npas4	1.55851	1.39937	2.59638	0.891731	0.00612393	neuronal PAS domain protein 4(Npas4)
56089	Ramp3	-0.929343										Ramp3	0.97033	1.17898	2.67725	1.18321	0.0154015	receptor (calcitonin) activity modifying protein 3(Ramp3)
29861	Dpf1	-0.928762								Dpf1		Dpf1	9.66896	7.55872	10.7527	0.508487	0.0339545	D4, zinc and double PHD fingers family 1(Dpf1)
77018	Col25a1	-0.928731	Col25a1									Col25a1	3.25076	3.62488	5.41089	0.577931	0.0108525	collagen, type XXV, alpha 1(Col25a1)
93842	Igsf9	-0.927979										Igsf9	1.0712	1.07336	1.93513	0.850304	0.00612393	immunoglobulin superfamily, member 9(Igsf9)
15114	Hap1	-0.927829	Hap1	Hap1				Hap1				Hap1	106.377	96.0982	133.585	0.475174	0.0190522	huntingtin-associated protein 1(Hap1)
237847	Rtn4rl1	-0.926099										Rtn4rl1	2.18154	2.17054	3.82712	0.818209	0.00612393	reticulon 4 receptor-like 1(Rtn4rl1)
18530	Pcdh8	-0.923964										Pcdh8	5.93683	5.55078	8.67046	0.643419	0.00612393	protocadherin 8(Pcdh8)
15208	Hes5	-0.9209										Hes5	5.85571	6.18442	11.3977	0.882028	0.00612393	hairy and enhancer of split 5 (Drosophila)(Hes5)
237397	C2cd4c	-0.918388										C2cd4c	1.3332	1.18278	1.78728	0.595576	0.0190522	C2 calcium-dependent domain containing 4C(C2cd4c)
18740	Pitx1	-0.91837								Pitx1		Pitx1	0.485259	0.203475	0.670876	1.7212	0.00612393	paired-like homeodomain transcription factor 1(Pitx1)
20562	Slit1	-0.916206										Slit1	8.5361	8.88594	13.3805	0.590533	0.00612393	slit homolog 1 (Drosophila)(Slit1)
20370	Sez6	-0.915021	Sez6									Sez6	23.0622	21.9399	29.8835	0.445789	0.0369194	seizure related gene 6(Sez6)
53420	Syt5	-0.91448										Syt5	16.8733	15.6014	24.5439	0.653685	0.00612393	synaptotagmin V(Syt5)
319586	Celf5	-0.914466										Celf5	13.9485	13.0388	20.0905	0.623695	0.00612393	CUGBP, Elav-like family member 5(Celf5)
110891	Slc8a2	-0.911845	Slc8a2									Slc8a2	8.26505	8.68413	12.5161	0.527331	0.0190522	solute carrier family 8 (sodium/calcium exchanger), member 2(Slc8a2)
277432	Vstm2l	-0.911358										Vstm2l	50.3804	38.6875	59.8079	0.628468	0.00612393	V-set and transmembrane domain containing 2-like(Vstm2l)
12322	Camk2a	-0.911011	Camk2a	Camk2a	Camk2a	Camk2a	Camk2a	Camk2a	Camk2a			Camk2a	21.0447	22.6878	33.7043	0.571016	0.00612393	calcium/calmodulin-dependent protein kinase II alpha(Camk2a)
13798	En1	-0.910058	En1	En1					En1	En1		En1	5.32141	5.42824	10.5933	0.964591	0.00612393	engrailed 1(En1)
12822	Col18a1	-0.909066	Col18a1									Col18a1	2.23775	1.78494	2.67409	0.583175	0.0108525	collagen, type XVIII, alpha 1(Col18a1)
12297	Cacnb3	-0.908283	Cacnb3									Cacnb3	14.2976	14.4912	21.0974	0.541885	0.00612393	calcium channel, voltage-dependent, beta 3 subunit(Cacnb3)
64011	Nrgn	-0.905143	Nrgn								Nrgn	Nrgn	21.9464	14.3571	44.0235	1.6165	0.00612393	neurogranin(Nrgn)
20669	Sox14	-0.904803								Sox14		Sox14	0.742073	1.03652	2.27973	1.13711	0.00612393	SRY (sex determining region Y)-box 14(Sox14)
23934	Ly6h	-0.903514										Ly6h	92.3938	86.3007	136.464	0.661077	0.00612393	lymphocyte antigen 6 complex, locus H(Ly6h)
54712	Plxnc1	-0.903306										Plxnc1	2.64865	3.03495	4.52455	0.5761	0.0154015	plexin C1(Plxnc1)
75718	Vwa5b1	-0.902813										Vwa5b1	1.78722	2.10539	3.70739	0.816314	0.0108525	von Willebrand factor A domain containing 5B1(Vwa5b1)
27385	Magel2	-0.900553	Magel2									Magel2	3.04725	2.92413	4.37668	0.581826	0.0154015	melanoma antigen, family L, 2(Magel2)
114142	Foxp2	-0.900513	Foxp2	Foxp2						Foxp2		Foxp2	1.59217	1.8638	3.25238	0.803245	0.00612393	forkhead box P2(Foxp2)
19736	Rgs4	0.902664	Rgs4	Rgs4	Rgs4							Rgs4	24.0326	27.9393	17.2752	-0.693596	0.00612393	regulator of G-protein signaling 4(Rgs4)
20377	Sfrp1	0.903531										Sfrp1	5.05406	5.53255	3.68398	-0.586681	0.0306196	secreted frizzled-related protein 1(Sfrp1)
399548	Scn4b	0.908722										Scn4b	74.0418	73.3523	50.1589	-0.548337	0.0154015	sodium channel, type IV, beta(Scn4b)
19144	Klk6	0.910563										Klk6	37.3269	33.928	24.2008	-0.487424	0.0369194	kallikrein related-peptidase 6(Klk6)
19885	Rorc	0.911344								Rorc		Rorc	2.96839	2.54802	1.44544	-0.81787	0.0154015	RAR-related orphan receptor gamma(Rorc)
15410	Hoxb3	0.914908								Hoxb3		Hoxb3	2.98471	1.88576	0.323264	-2.54436	0.00612393	homeobox B3(Hoxb3)
104245	Slc6a5	0.920005	Slc6a5									Slc6a5	45.0599	36.774	14.2546	-1.36726	0.00612393	solute carrier family 6 (neurotransmitter transporter, glycine), member 5(Slc6a5)
16485	Kcna1	0.929277	Kcna1									Kcna1	43.2047	45.9723	33.117	-0.473193	0.0339545	potassium voltage-gated channel, shaker-related subfamily, member 1(Kcna1)
50795	Sh3bgr	0.930295										Sh3bgr	15.9014	15.7007	6.97204	-1.17118	0.00612393	SH3-binding domain glutamic acid-rich protein(Sh3bgr)
14314	Fstl1	0.939561										Fstl1	25.4014	27.2161	16.7927	-0.696622	0.00612393	follistatin-like 1(Fstl1)
79201	Tnfrsf23	0.940856										Tnfrsf23	0.860717	1.16868	0.573569	-1.02684	0.00612393	tumor necrosis factor receptor superfamily, member 23(Tnfrsf23)
12294	Cacna2d3	0.945768	Cacna2d3	Cacna2d3	Cacna2d3	Cacna2d3						Cacna2d3	13.1002	14.2214	9.92973	-0.518236	0.0267922	calcium channel, voltage-dependent, alpha2/delta subunit 3(Cacna2d3)
64176	Sv2b	0.950612										Sv2b	16.828	20.7197	14.5801	-0.506998	0.0108525	synaptic vesicle glycoprotein 2 b(Sv2b)
268567	Tmem229b	0.955672										Tmem229b	19.5097	19.5097	13.7716	-0.5025	0.0369194	transmembrane protein 229B(Tmem229b)
20750	Spp1	0.962531	Spp1									Spp1	54.7988	59.6442	24.3315	-1.29356	0.00612393	secreted phosphoprotein 1(Spp1)
20194	S100a10	0.981614	S100a10	S100a10				S100a10	S100a10			S100a10	40.3101	42.9894	29.5869	-0.53902	0.0306196	S100 calcium binding protein A10 (calpactin)(S100a10)

## Sheet: Supplementary _file_7
Supplementary file 7. Agglomerative hierarchical clustering (AHC) of VTA DEGs in winners versus losers comparison

## Sheet: Supplementary _Table_8
Supplementary Table 8. The summary statistics for the sequenced libraries *
*The quality metrics of the mapped data were collected using Spliced Transcripts Alignment to a Reference (STAR) software (Dobin A. et al., Bioinformatics. 2013. 29(1): 15-21.)
		controls			winners			losers
	37	38	39	40	41	42	43	44	45
Number of input reads |	25834173	12509624	27216236	27709454	29851995	23595987	6839352	18478870	26613536
Average input read length |	50	50	50	50	50	50	50	50	50
UNIQUE READS:
Uniquely mapped reads number |	19783425	9699932	21883399	22349955	24100104	18837585	5110152	14803009	21561812
Uniquely mapped reads % |	0.7658	0.7754	0.8041	0.8066	0.8073	0.7983	0.7472	0.8011	0.8102
Average mapped length |	49.55	49.49	49.67	49.68	49.68	49.66	49.32	49.65	49.7
Number of splices: Total |	1542350	922395	1812412	2015536	2079414	1656204	403380	1359041	1857496
Number of splices: Annotated (sjdb) |	1512145	904319	1777570	1978272	2040346	1625257	393601	1332585	1823445
Number of splices: GT/AG |	1528582	914729	1796106	1997214	2060497	1641307	400249	1347016	1840528
Number of splices: GC/AG |	12555	6964	14734	16641	17141	13528	2883	10946	15307
Number of splices: AT/AC |	1213	702	1572	1681	1776	1369	248	1079	1661
Number of splices: Non-canonical |	0	0	0	0	0	0	0	0	0
Mismatch rate per base, % |	0.0078	0.008	0.0058	0.0057	0.0059	0.0061	0.0109	0.0059	0.0056
Deletion rate per base |	0.0001	0.0002	0.0001	0.0001	0.0001	0.0001	0.0003	0.0002	0.0001
Deletion average length |	3.74	4.13	3.06	3.35	3.05	3.56	4.84	3.8	3.09
Insertion rate per base |	0.0001	0.0001	0.0001	0.0001	0.0001	0.0001	0.0002	0.0001	0.0001
Insertion average length |	1.17	1.11	1.15	1.15	1.16	1.17	1.06	1.12	1.16
MULTI-MAPPING READS:
Number of reads mapped to multiple loci |	3437873	1677450	2958994	3208936	3250723	2758440	1016246	2161236	2950874
% of reads mapped to multiple loci |	0.1331	0.1341	0.1087	0.1158	0.1089	0.1169	0.1486	0.117	0.1109
Number of reads mapped to too many loci |	181099	81559	216758	198472	224265	175549	31948	145562	204850
% of reads mapped to too many loci |	0.007	0.0065	0.008	0.0072	0.0075	0.0074	0.0047	0.0079	0.0077
UNMAPPED READS:
% of reads unmapped: too many mismatches |	0	0	0	0	0	0	0	0	0
% of reads unmapped: too short |	0.0885	0.0812	0.0725	0.0648	0.0703	0.0719	0.0983	0.0694	0.0649
% of reads unmapped: other |	0.0057	0.0028	0.0068	0.0056	0.0059	0.0054	0.0013	0.0047	0.0063
CHIMERIC READS:
Number of chimeric reads |	0	0	0	0	0	0	0	0	0
% of chimeric reads |	0	0	0	0	0	0	0	0	0
